1 **Protein phosphatase 1 regulatory inhibitor subunit 14C promotes triple-negative breast**  
2 **cancer progression via sustaining inactive glycogen synthase kinase 3 beta**

3 Running Title: PPP1R14C maintains GSK3 $\beta$  inactivation in TNBC

4 Yunting Jian<sup>1,#</sup>, Lingzhi Kong<sup>1,#</sup>, Hongyi Xu<sup>2,#</sup>, Xinjian Huang<sup>1</sup>, Yue Li<sup>1</sup>, Dongni Shi<sup>1</sup>,  
5 Yunyun Xiao<sup>1</sup>, Muwen Yang<sup>1</sup>, Siqi Li<sup>2</sup>, Xiangfu Chen<sup>1</sup>, Ying Ouyang<sup>1</sup>, Yameng Hu<sup>3</sup>, Xin  
6 Chen<sup>4</sup>, Pian Liu<sup>5,\*</sup>, Weidong Wei<sup>2,\*</sup>

7 <sup>1</sup> Department of Experimental Research, Sun Yat-sen University Cancer Center, State Key  
8 Laboratory of Oncology in South China, Collaborative Innovation Center for Cancer  
9 Medicine, Guangzhou, 510060, China.

10 <sup>2</sup> Department of Breast Surgery, Sun Yat-Sen University Cancer Center, State Key Laboratory  
11 of Oncology in South China, Collaborative Innovation Center for Cancer Medicine,  
12 Guangzhou, 510060, China.

13 <sup>3</sup> Department of Biochemistry, Zhongshan School of Medicine, Sun Yat-sen University,  
14 Guangzhou, 510080, China.

15 <sup>4</sup> Departments of Pathophysiology, School of Basic Medical Sciences, Guangzhou Medical  
16 University, Guangzhou, 511436, China.

17 <sup>5</sup> Cancer Center, Union Hospital, Tongji Medical College, Huazhong University of Science  
18 and Technology, Wuhan, 430022, China.

19 \*Correspondence to: Weidong Wei, M.D. Ph.D., State Key Laboratory of Oncology in  
20 Southern China and Department of Breast Surgery, Sun Yat-sen University Cancer Center,  
21 Guangzhou 510060, China. Phone: +8613822278328. E-mail: [weiwd@sysucc.org.cn](mailto:weiwd@sysucc.org.cn); Or Pian  
22 Liu, e-mail: [liupianamazing@126.com](mailto:liupianamazing@126.com).

23 #These authors contributed equally to this work.

24 **Funding**

25 This work was supported by the National Natural Science Foundation of China [grant  
26 numbers 81772800, 82072945, 82003052, 82003128 and 81802405]; the Natural Science  
27 Foundation of Guangdong Province [grant numbers 2020A1515010260]; and the China  
28 Postdoctoral Science Foundation [grant number 2019M663290].

29 **Competing interests:** There are no competing financial interests to declare.

30 **Abstract**

31 The majority of clinical deaths among patients with triple-negative breast cancer (TNBC) are  
32 caused by uncontrolled cell proliferation and aggressive metastases, which is regulated by  
33 hyperactive glycogen synthase kinase 3 beta (GSK3 $\beta$ ); however, the underlying mechanisms  
34 remain largely unknown. In the present study, we found that protein phosphatase 1 regulatory  
35 inhibitor subunit 14C (PPP1R14C) was specifically upregulated in TNBC, compared with that  
36 in normal tissues and non-TNBC. High PPP1R14C expression correlated significantly with  
37 shorter 5-year relapse-free survival and overall survival in patients with TNBC.  
38 Overexpressing PPP1R14C promoted, while suppression of PPP1R14C decreased the cell  
39 proliferation and the aggressive phenotype of TNBC cells, *in vitro* and *in vivo*. Importantly,  
40 we revealed that PPP1R14C interacted with and inactivated type 1 Ser/Thr protein  
41 phosphatase (PP1) to sustain GSK3 $\beta$  phosphorylation at S9, and induced the ubiquitylation  
42 and degradation of non-phosphorylated GSK3 $\beta$  (S9A) via recruiting E3 ligase, TRIM25.  
43 Furthermore, treating with C2 ceramide (C2), which recovered kinase activity of GSK3 $\beta$ ,  
44 resulted in tumor growth inhibition in PPP1R14C-overexpressing TNBC cells. Our findings  
45 reveal a novel mechanism whereby PPP1R14C sustains inactive GSK3 $\beta$ , which might lead to  
46 targeted therapy for TNBC.

47 **Keywords:** TNBC, PPP1R14C, GSK3 $\beta$ , phosphorylation, degradation

## 48 **Introduction**

49 Triple-negative breast cancer (TNBC) is an aggressive breast cancer subtype characterized by  
50 the absence of the estrogen receptor (ER), progesterone receptor (PR) and human epidermal  
51 growth factor-2 (HER-2) amplification [1]. Lack of the receptors listed above means that  
52 TNBC does not respond to endocrine therapy or anti-HER-2 therapies; therefore, treatment is  
53 usually based on traditional chemotherapy [2, 3]. Uncontrolled proliferation and rapid  
54 recurrence are the main characteristics and challenges in treating TNBC, which might reduce  
55 the efficacy of chemotherapy [4]. Hence, there is an urgent need to develop new and effective  
56 treatments for TNBC, especially those involving actionable molecular targets.

57 Glycogen synthase kinase 3 beta (GSK3 $\beta$ ), a highly evolutionarily conserved Ser/Thr  
58 kinase, is involved in diverse physiological and pathological processes via its selective  
59 phosphorylation of many substrates [5-7]. GSK3 $\beta$  is constitutively active in basal-state cells  
60 and acts as a tumor suppressor by phosphorylating oncogenic transcription factors (TFs),  
61 leading to their degradation [8]. When activated by oncogenic pathways, GSK3 $\beta$  is  
62 phosphorylated into an inactive state at Ser9, which leads to the accumulation and activation  
63 of downstream oncogenic signaling [9-13]. Elevated phosphorylated p-GSK3 $\beta$  (Ser9, inactive  
64 form) promoted epithelial-mesenchymal transition and metastasis in non-small cell lung  
65 carcinoma cells by accumulating Slug and Snail proteins [14]. Furthermore, decreased  
66 p-GSK3 $\beta$  (Ser9) levels inhibited cell proliferation and 7,12-dimethylbenz[a]anthracene  
67 (DMBA)-induced tumor growth in TNBC cell lines [15]. Therefore, p-GSK3 $\beta$  (Ser9) might  
68 play an important role in the progress of neoplastic diseases. The main phosphatase that  
69 reverses the phosphorylation state of GSK3 $\beta$  is protein phosphatase like type 1 Ser/Thr

70 protein phosphatase (PP1), which is the key regulator in keeping the dynamically balance [16].  
71 However, studies observed that GSK3 $\beta$  is an inactive form in human cancers, including  
72 TNBC, indicating widespread compromised phosphatase activity in tumors [17-19]. However,  
73 the molecular mechanisms in regulating GSK3 $\beta$  in TNBC remain unknown.

74 *PPP1R14C* has been discovered among morphine-regulated brain mRNAs, and encodes  
75 protein phosphatase 1 regulatory inhibitor subunit 14C, which has an inhibitory effect on PP1  
76 [20, 21]. Daniel Horvath et al have revealed that PPP1R14C decreases the release of  
77 neurotransmitters by sustaining synaptosome associated protein 25 (SNAP25) in the  
78 phosphorylated state to regulate neuronal exocytosis [22]. Moreover, overexpression of  
79 PPP1R14C increased the phosphorylated RB transcriptional corepressor 1 (RB1), promoting  
80 leukemic cell survival under chemotherapy treatment [23]. Thus, PPP1R14C might be  
81 involved in human cancer progression by regulating the protein phosphorylation state.  
82 However, the functions and mechanism of PPP1R14C in TNBC remains to be explored.

83 In the present study, we found that PPP1R14C was specifically overexpressed in TNBC  
84 compared with that in normal tissues and non-TNBC and demonstrated that PPP1R14C  
85 played a vital role in promoting tumorigenesis of TNBC by sustaining a steady-state of  
86 p-GSK3 $\beta$  (S9) via compromising the ability of PP1 to dephosphorylate GSK3 $\beta$ , and inducing  
87 the ubiquitylation and degradation of non-phosphorylated GSK3 $\beta$  (S9A), which specifically  
88 recruited E3 ligase, TRIM25. Importantly, C2 ceramide (C2) treatment reversed the malignant  
89 phenotype induced by PPP1R14C, indicating a potential novel strategy to treat TNBC.

90

## 91 **Results**

### 92 **PPP1R14C is specifically upregulated in TNBC**

93 The phosphorylation state of GSK3 $\beta$  is balanced by kinases and phosphatases; however, the  
94 underlying mechanism for the persistent inhibition state of GSK3 $\beta$  in TNBC is unknown. To  
95 explore the mechanism of GSK3 $\beta$  regulation in TNBC, we first analyzed public cancer  
96 datasets from The Cancer Genome Atlas (TCGA) and identified 48 genes that were  
97 specifically upregulated in TNBC, compared with normal tissues and non- TNBC cancer  
98 tissues (Figure 1A and 1B). Among them, we focused on PPP1R14C because its inhibitory  
99 effect on PP1, the predominant phosphatase regulating GSK3 $\beta$  [20]. PPP1R14C mRNA levels  
100 were robustly upregulated in TNBC samples in the TCGA and Gene expression Omnibus  
101 (GEO) dataset (Figure 1C). Significantly, PPP1R14C was markedly upregulated in basal-like  
102 breast cancer (BLBC) tissues, followed by normal tissues and other subtypes (Luminal A,  
103 Luminal B and Her-2) (Figure 1D). Next, we detected PPP1R14C expression in breast cancer  
104 tissues and cell lines. Both the mRNA and protein levels of PPP1R14C were upregulated  
105 significantly in TNBC samples and cell lines compared with those in normal tissues and  
106 non-TNBCs (Figure 1E and 1F). Thus, these results suggested a substantial increase of  
107 PPP1R14C in TNBC.

### 108 **High expression of PPP1R14C is associated with poor prognosis in patients with TNBC**

109 The clinical significance of high PPP1R14C expression was further assessed by  
110 immunohistochemistry (IHC) staining in 10 adjacent normal tissues and 150 archived breast  
111 cancer tissue samples, including 50 non-TNBC cases and 100 TNBC cases. IHC analysis  
112 revealed that PPP1R14C was upregulated markedly in TNBC, but was only detectable at low

113 levels in normal breast tissues and non-TNBC tissues. The specimens with a staining index  
114 (SI)  $\geq 6$  were defined as PPP1R14C-high, while the others were PPP1R14C-low (Figure 2A).  
115 Correlation analysis showed that high PPP1R14C expression was associated significantly  
116 with advanced T classification ( $P = 0.013$ ), and relapse status within 5 years ( $P = 0.002$ ) in  
117 patients with TNBC (Figure 2B, Supplementary Table 2). Importantly, Kaplan- Meier survival  
118 curves and log-rank tests revealed that patients with high PPP1R14C expression suffered  
119 significantly poorer 5-year overall survival (OS) and relapse-free survival (RFS) in the TNBC  
120 subgroup ( $P = 0.004$ , hazard ratio (HR) = 5.046, 95% confidence interval (CI) = 2.097-12.14;  
121  $P < 0.001$ , hazard ratio (HR) = 6.164, 95% confidence interval (CI) = 2.72-13.97,  
122 respectively); Figure 2C, Supplementary Table S3). In addition, the available online database  
123 Kaplan- Meier Plotter (<http://kmplot.com/analysis>) showed that breast cancer patients with  
124 high PPP1R14C expression had significantly shorter RFS in all breast cancer patients and  
125 basal-like subgroup (Figure 2D). Moreover, multivariate Cox regression analysis indicated  
126 that high PPP1R14C expression and T classification as independent prognostic factors for  
127 5-year OS and 5-year RFS in TNBC (Figure 2E and Supplementary Table S3). Thus,  
128 upregulation of PPP1R14C might contribute to TNBC progression, leading to a poor clinical  
129 outcome.

### 130 **PPP1R14C promotes tumor progression in TNBC cells *in vitro***

131 To further investigate the biological role of PPP1R14C in TNBC progression, we first stably  
132 overexpressed PPP1R14C or silenced endogenous PPP1R14C expression in MDA-MB-231  
133 and SUM159PT breast cancer cell lines (Figure 3A). Strikingly, PPP1R14C- overexpressing  
134 TNBC cells displayed higher growth rates and increased anchorage-independent growth

135 ability compared with vector-control cells, and had increased proportions of cells in the S  
136 phase and reduced proportions of cells in the G1 phase (Figures 3B-3E, Supplementary Figure  
137 1A and 1B). In addition, upregulation of PPP1R14C strongly increased the mobility and  
138 invasion of TNBC cells (Figures 3F and 3G, Supplementary Figure 1C and 1D).  
139 Correspondingly, silencing PPP1R14C reduced the growth rates and anchorage-independent  
140 growth ability significantly, decreased the proportions of cells in the S phase and increased  
141 proportions of cells in the G1 phase, and decreased the TNBC cells invasion (Figure 3B-3G  
142 and Supplementary Figure 1A-1D). Collectively, these results suggested that PPP1R14C plays  
143 an important role of TNBC aggressiveness.

#### 144 **PPP1R14C contributes to TNBC tumorigenesis and metastasis**

145 Next, we assessed the effect of PPP1R14C on tumorigenesis *in vivo*. We generated xenografts  
146 through subcutaneous injection of stable SUM159PT cell lines and measured tumor growth.  
147 Compared with the control groups, tumor growth was markedly enhanced in the  
148 PPP1R14C-overexpressing group and suppressed in PPP1R14C silenced group (Figure 4A  
149 and Supplementary Figure 2A). Tumors overexpressing PPP1R14C had high expression of  
150 the proliferation marker Ki-67 compared with that in the vector group, whereas the  
151 PPP1R14C-silenced tumors showed decreased Ki-67 expression (Figure 4B and  
152 Supplementary Figure 2B). Next, the effects of PPP1R14C on breast cancer metastasis were  
153 examined in lung colonization models. Stable SUM159PT cell lines were injected into Balb/c  
154 nude mice via the lateral tail veins. Metastatic activity was evaluated using bioluminescence  
155 imaging (BLI) of luciferase-transduced cells and by hematoxylin and eosin (H&E) staining of  
156 lung metastases sections. Upregulation of PPP1R14C increased the lung metastasis burden

157 (Figure 4C). Importantly, overexpressing PPP1R14C decreased the survival time and  
158 proportion of mice strikingly (Figure 4D). In contrast, downregulation of PPP1R14C  
159 significantly reduced lung tumor outgrowth and mouse deaths (Figure 4C and 4D).

160 We further examined the role of PPP1R14C in a spontaneous metastatic model. Mice  
161 were injected subcutaneously with the luciferase-expressing 4T1 cells ( $1 \times 10^5$ ), which are  
162 highly metastatic. Strikingly, BLI revealed that the metastasis of 4T1 cells was promoted  
163 strongly in the PPP1R14C overexpression group, but suppressed in the PPP1R14C silenced  
164 group, which was confirmed by counting the visible metastatic lesions (Figure 4E and 4F).  
165 Moreover, upregulating PPP1R14C shortened the survival time of mice strikingly  
166 (Supplementary Figure 2C). These findings indicated that PPP1R14C enhances tumorigenesis  
167 and metastasis of TNBC.

#### 168 **PPP1R14C interacts with PP1 to constantly inhibit GSK3 $\beta$ activity**

169 PPP1R14C is a powerful inhibitor for PP1, a major phosphatase responsible for modulating  
170 the phospho- and dephospho-balance of numerous substrate proteins[24]. To identify whether  
171 GSK3 $\beta$  is the exact substrate protein affected by the PPP1R14C and PP1 interaction in  
172 TNBC cells, we screened a collection of PP1 substrates [25-30]. The results indicated that  
173 overexpressing PPP1R14C significantly increased, while silencing PPP1R14C decreased the  
174 level of phosphorylation GSK3 $\beta$ , but did not influence the other substrate proteins (Figure  
175 5A). In addition, PPP1R14C only affected the level of phosphorylation GSK3 $\beta$  at Ser9, but  
176 not Tyr216, the other inactive site of GSK3 $\beta$  (Figure 5A). Importantly, PPP1R14C  
177 overexpression decreased, while knockdown of PPP1R14C increased the expression levels of  
178 known GSK3 $\beta$  downstream genes (Figure 5B), indicating that PPP1R14C could sustain



179 phosphorylated GSK3 $\beta$ . Reciprocal immunoprecipitation (IP) assays using antibodies against  
180 PPP1R14C and PP1 demonstrated that PPP1R14C/PP1/p-GSK3 $\beta$  (Ser9) formed a complex in  
181 SUM159PT cells (Figure 5C). IP assays using HA-GSK3 $\beta$  transduced into HeLa cells together  
182 with Flag-PPP1R14C and myc-PP1 were performed under treatment of SHIP2-IN-1, a  
183 GSK3 $\beta$  inhibitor that deactivates GSK3 $\beta$  via phosphorylating at Ser9 [31]. The results showed  
184 that PPP1R14C and PP1 specifically interacted with p-GSK3 $\beta$  (Ser9) (Figure 5D).  
185 Additionally, silencing PP1 did not abrogated the interaction of PPP1R14C with p-GSK3 $\beta$   
186 (Ser9) in TNBC cell lines, indicating that PPP1R14C binds to p-GSK3 $\beta$  (Ser9) in a  
187 PP1-independent manner endogenously (Figure 5E). Furthermore, PPP1R14C overexpression  
188 decreased PP1 activity, and increased the p-GSK3 $\beta$  level, while silencing PPP1R14C showed  
189 reversed effects (Figure 5F-5I). These results suggested that PPP1R14C interacts with PP1  
190 and inhibits PP1-induced p-GSK3 $\beta$  (Ser9) dephosphorylation.

### 191 **PPP1R14C accelerates non-phosphorylated GSK3 $\beta$ (S9A) degradation**

192 Interestingly, PPP1R14C overexpression increased p-GSK3 $\beta$  (Ser9) expression, but reduced  
193 the protein level of GSK3 $\beta$ , while did not alter its mRNA expression in TNBC cells (Figure  
194 6A and Supplementary Figure 3A). It has reported that degradation of GSK3 $\beta$  is largely  
195 dependent on proteasome pathway in lung epithelial cells [32]. To determine whether  
196 PPP1R14C regulates the GSK3 $\beta$  stability, we detected its protein levels in the presence of  
197 cycloheximide (CHX) and MG132. Interestingly, the half-life of GSK3 $\beta$  was shortened  
198 remarkably under these treatments in PPP1R14C-overexpressing SUM159PT and  
199 MDA-MB-231 cells compared with that in the vector group, and the opposite effects were  
200 observed in the PPP1R14C-silenced cells (Figure 6B and Supplementary Figure 3B-3C).

201 Furthermore, altered PPP1R14C did not affect the half-life of p-GSK3 $\beta$  (Ser9)  
202 (Supplementary Figure 3D). In addition, we constructed TNBC cell lines stably expressing  
203 mutant HA-GSK3 $\beta$  (S9A), which fails to be phosphorylated. IP assays performed in  
204 SUM159PT, SUM159PT-HA-GSK3 $\beta$  (S9A) and Hela cell lines to detect the ubiquitination of  
205 different GSK3 $\beta$  forms. High levels of PPP1R14C promoted total and non-phosphorylated  
206 GSK3 $\beta$  (S9A) ubiquitination and low PPP1R14C levels inhibited this process, while  
207 p-GSK3 $\beta$  (Ser9) ubiquitination was not affected (Figure 6C and Supplementary Figure  
208 4A-4B). The similar results were observed in MDA-MB-231 and MDA-MB-231-HA-GSK3 $\beta$   
209 (S9A) cell lines (Supplementary Figure 4C).

210 To identify which E3 ubiquitin ligase is mediated by PPP1R14C to degrade  
211 non-phosphorylated GSK3 $\beta$ , mass spectrometry (MS) was used in SUM159PT. As shown in  
212 Figure 6D, tripartite motif containing 25 (TRIM25) was identified as a potent E3 ligase.  
213 Importantly, co-immunoprecipitation (Co-IP) using an anti-PPP1R14C antibody revealed that  
214 PPP1R14C could form complex with TRIM25 and GSK3 $\beta$  in SUM159PT cells. Furthermore,  
215 Co-IP was performed in Hela transfected with Flag-PPP1R14C, MYC-TRIM25, HA-GSK3 $\beta$   
216 or HA-GSK3 $\beta$  (S9A) and confirmed that PPP1R14C mediated  
217 TRIM25-total/non-phosphorylated GSK3 $\beta$  interaction (Figure 6E). Next, we generated a  
218 series of truncated mutants of GSK3 $\beta$  and TRIM25 to dissect functional domains of the  
219 GSK3 $\beta$ -TRIM25 interaction. IP assays showed that only those GSK3 $\beta$  truncations with the  
220 N1 domain could bound to TRIM25, and N1 mutant with S9A was also found in  
221 TRIM25-MYC immunoprecipitate, suggesting that the interaction between GSK3 $\beta$  and  
222 TRIM25 required the N-terminal domains (Supplementary Figure 4D). For TRIM25, we

223 constructed four TRIM25 truncates mutants, containing RING, B-box, coiled-coil (CC) and  
224 PRY/SPRY domain. And the immunoprecipitation assay showed that only TRIM25 truncated  
225 mutant containing B-box domain was necessary for its interaction with GSK3 $\beta$   
226 (Supplementary Figure 4D). As a ubiquitin E3 ligase, TRIM25 probably binds to and  
227 mediates the ubiquitination of GSK3 $\beta$ , resulting in GSK3 $\beta$  degradation. To test this  
228 hypothesis, Flag-Ub, TRIM25, HA-GSK3 $\beta$  or HA-GSK3 $\beta$  (S9A) were expressed into Hela  
229 cells and co-immunoprecipitated with anti-Flag antibody. As shown in Figure 6F, TRIM25  
230 promoted the total GSK3 $\beta$  and non-phosphorylated GSK3 $\beta$ -S9A ubiquitination. To elucidate  
231 the role of TRIM25 as an E3 ligase, we constructed a TRIM25 mutant with Glu9 and Glu10  
232 changed into Ala (termed as TRIM25-2EA), which lost its ubiquitination activity [30, 33]. IP  
233 data showed that exogenous expression of the wild type (WT) of TRIM25, other than  
234 TRIM25-2EA significantly enhanced the total GSK3 $\beta$  and non-phosphorylated GSK3 $\beta$ -S9A  
235 ubiquitination (Figure 6G). In addition, K183 of GSK3 $\beta$  has been recognized as the  
236 ubiquitination site, and exogenous co-IP further suggested that the mutation of GSK3 $\beta$  K183R  
237 prompted the disassembly of ubiquitin and GSK3 $\beta$  and impeded the interplay of TRIM25 and  
238 GSK3 $\beta$  (Figure 6H). Furthermore, PPP1R14C overexpression substantially increased the  
239 interaction of total/non-phosphorylated GSK3 $\beta$  and TRIM25, while PPP1R14C silencing  
240 inhibited this interaction (Figure 6I). Therefore, these results showed that PPP1R14C  
241 enhanced the degradation of non-phosphorylated GSK3 $\beta$  by increasing TRIM25-dependent  
242 ubiquitination.

243 **Blockage of the PPP1R14C/PP1/p-GSK3 $\beta$  axis results in growth inhibition of TNBC**  
244 **cells with high- PPP1R14C levels *in vitro* and *in vivo***

245 To validate that the PPP1R14C/PP1/p-GSK3 $\beta$  axis is involved in TNBC tumor progression,  
246 we established PP1-silenced (using shPP1, a short hairpin RNA targeting PP1) TNBC cell  
247 lines or treated cells with C2, a PP1 activator to reverse the inhibitory effect of  
248 PPP1R14C[34]. As expected, shPP1 and C2 administration impaired PPP1R14C-induced cell  
249 growth, invasion, G1-S transformation, and anchorage- independent growth in TNBC cells,  
250 suggesting that PP1 is essential for PPP1R14C- mediated GSK3 $\beta$  inactivation (Figure 7A-7E).  
251 Next, we injected SUM159PT cells stably overexpressing PPP1R14C into mice  
252 subcutaneously and observed the tumor growth in each experimental group. Tumors formed  
253 by shPP1- or C2-treated cells were much smaller than those in the control group (Figure 7F  
254 and Supplementary Figure 5A). IHC of Ki-67 in tumor specimens showed that silencing PP1  
255 or treating with C2 reduced the Ki-67 staining intensity markedly in PPP1R14C  
256 overexpressing tumors compared with that in the vehicle groups (Figure 7G and  
257 Supplementary Figure 5B). Furthermore, silencing PP1 or C2 treatment decreased the lung  
258 metastasis burden and mouse death in PPP1R14C-upregulated SUM159PT and 4T1 cells  
259 (Figure 7H-7J, Supplementary Figure 5C). In addition, we generated subcutaneous xenografts,  
260 a lung colonization model and a spontaneous metastatic model using TNBC vector cells. The  
261 effect of tumor growth and metastatic ability treating with silencing PP1 and C2 in vector  
262 cells comparable to that in PPP1R14C- overexpressing TNBC cells, only slightly repressed  
263 tumor growth and metastatic ability (Supplementary Figure 5D-5L). Collectively, these  
264 results suggested that blockage of the PPP1R14C/PP1/p-GSK3 $\beta$  axis might have anti-TNBC  
265 effects in the presence of a high- PPP1R14C level.

266 **Clinical relevance of the PPP1R14C/PP1/p-GSK3 $\beta$  axis in TNBC**

267 Finally, we assessed the PPP1R14C/PP1/p-GSK3 $\beta$  axis in clinical specimens. IHC staining  
268 for PP1 and p-GSK3 $\beta$  was performed in the same cohort of 100 TNBC patient specimens.  
269 PPP1R14C expression correlated strongly with PP1 and p-GSK3 $\beta$  (Ser9) levels, suggesting  
270 that the PPP1R14C/PP1/p-GSK3 $\beta$  axis was clinically relevant (Figure 8A and Supplementary  
271 Figure 6A).

272

## 273 **Discussion**

274 Patients with TNBC suffer worse prognosis than those with other subtypes because of higher  
275 rates of recurrence and limited therapeutic options. Moreover, TNBC is usually more  
276 aggressive and more likely to metastasize[35, 36]. Therefore, effective and specific regulators  
277 for TNBC are urgently needed. The present study showed that PPP1R14C was markedly  
278 overexpressed in TNBC tissues and cell lines, but not in normal tissues or non-TNBC.  
279 Furthermore, patients with TNBC and high PPP1R14C expression were more likely to have  
280 shorter 5- year OS and RFS, compared with other subtypes. PPP1R14C inactivated PP1 to  
281 sustain GSK3 $\beta$  phosphorylation at Ser9, which promoted the degradation of GSK3 $\beta$ , and  
282 contributed to the aggressiveness of TNBC. Moreover, blocking the function of PPP1R14C  
283 using C2 inhibited the malignant phenotype in TNBC cells. In conclusion, our results revealed  
284 the oncogenic role of PPP1R14C in TNBC and provided a new biomarker for effective  
285 targeted therapy.

286 GSK3 $\beta$  is implicated in many cell processes, including the regulation of transcription  
287 factors, cell-cycle progression, cell survival, apoptosis and cell migration[37].  
288 Non-phosphorylated GSK3 $\beta$  is highly active in the basal-state and exerts an inhibitory effect  
289 on its downstream pathways[38]. Persistently inactive GSK3 $\beta$  has been found in various  
290 cancers, especially TNBC, suggesting that p-GSK3 $\beta$  has an oncogenic role in neoplastic  
291 disease[17, 19]. However, Cao Q et al have found that the active form of GSK3 $\beta$  might also  
292 function as an oncogene, because it contributed to cell proliferation by inducing S phase entry  
293 in ovarian cancer cells[18]. These apparently contradictory results suggest that the functions  
294 of GSK3 $\beta$  might differ according to the cell type and cellular context[37]. The present study

295 demonstrated that PPP1R14C, together with PP1 and upstream stimulations, maintained  
296 GSK3 $\beta$  in a Ser9-phosphorylated and inactive state to promote tumor proliferation and  
297 metastasis in TNBC. Furthermore, PPP1R14C promoted non-phosphorylated GSK3 $\beta$   
298 ubiquitin-dependent degradation, which synergistically amplified and prolonged p-GSK3 $\beta$   
299 signaling in TNBC. These results represent a novel mechanism that explains how GSK3 $\beta$   
300 remains inactive in TNBC and further supports the oncogenic functions of p-GSK3 $\beta$ .

301 Studies have indicated that PPP1R14C regulates protein activity dependent on its  
302 inhibitory effect on PP1, which modulates the biological activities of numerous key proteins  
303 by regulating their phosphorylation states directly[20, 39]. D óra Dedinszki et al have reported  
304 that PPP1R14C overexpression increased the phosphorylation level of RB1 and decreased the  
305 chemosensitivity of leukemia cells to chemotherapeutic drugs[23]. However, studies on  
306 PPP1R14C in human tumors are limited. The present study revealed that PPP1R14C was  
307 specifically upregulated in TNBC and PPP1R14C overexpression correlated strongly with  
308 worse prognosis of patients with TNBC. Furthermore, PPP1R14C promoted cell proliferation,  
309 migration, invasion, tumor growth and lung metastasis of TNBC cells by sustaining the  
310 phosphorylation state of GSK3 $\beta$  at Ser9 and degrading non-phosphorylated GSK3 $\beta$ ,  
311 demonstrating the novel oncogenic functions of PPP1R14C, which might serve as a targeted  
312 therapeutic strategy in TNBC. Although PPP1R14C was reported as down-regulated in breast  
313 cancer cells, we detected PPP1R14C in all the breast cancer subtypes and discovered that  
314 PPP1R14C was specifically overexpressed in TNBC, which was supported by public cancer  
315 datasets from the GEO and TCGA[40]. The discovery suggested that PPP1R14C plays a  
316 specific role in TNBC progression.

317 As a PP1 inhibitory protein, PPP1R14C shares an N-terminal binding domain (residues  
318 20-24; RVFFQ) with most PP1 regulatory proteins[41]. PP1 regulatory proteins target PP1 to  
319 distinct subcellular locations or specific substrates[27, 42]. The interaction of  
320 myosin-targeting subunit M110 with PP1 enhanced its activity towards myosin P-light  
321 chains[43]. Interestingly, PPP1R14C is overexpressed in TNBC, which suggested that  
322 excessive PPP1R14C could efficiently compete for PP1 binding and disrupt PP1's interaction  
323 with its other regulatory partners. In this study, we found that interaction of PPP1R14C with  
324 PP1 increased its specificity for p-GSK3 $\beta$  (Ser9), compared with other tested substrates.  
325 suggesting the PPP1R14C- PP1 interaction enhanced their affinity for p-GSK3 $\beta$  (Ser9) to  
326 strongly inhibit its dephosphorylation. Thus, PPP1R14C-modulated persistence of p-GSK3 $\beta$   
327 might occur specifically in TNBC.

328 In summary, we identified an oncogenic role of PPP1R14C in TNBC in which it interacts  
329 with PP1 to maintain the phosphorylation of GSK3 $\beta$  at Ser9, and induces non-phosphorylated  
330 GSK3 $\beta$  ubiquitylation and degradation, contributing to aggressive phenotype of TNBC  
331 (Figure 8B). These findings increase our awareness of the regulatory mechanisms of GSK3 $\beta$   
332 activity in TNBC, and provide new directions for therapeutic strategies to treat TNBC.  
333 Further investigation is warranted to determine whether a PPP1R14C inhibitor may be an  
334 effective approach to cure TNBC.



## 335 **Materials and Methods**

### 336 **Cell lines and cell culture**

337 Breast cancer cell lines (MCF-7, ZR75-30, SK-BR-3, HCC1937, MDA-MB-231 and BT-549)  
338 and Hela were provided by the American Type Culture Collection (Manassas, VA, USA) and  
339 the SUM159PT breast cancer cell line was from Asterand Bioscience (Detroit, MI, USA).  
340 BT-549 cells were cultured in RPMI 1640 with 10% FBS, SUM159PT was cultured in Ham's  
341 F-12 with 5% FBS, 1 µg/ml hydrocortisone, 5 µg/ml insulin and 10 mM HEPES, and the  
342 other cells were cultured in Dulbecco's modified Eagle's medium (DMEM) with 10% fetal  
343 bovine serum, 100 U/ml penicillin, and 100 µg/ml streptomycin. Cells were maintained at  
344 37 °C in a 5% CO<sub>2</sub> incubator. Cells were routinely tested for mycoplasma contamination using  
345 the Lookout Mycoplasma PCR Detection Kit (#MP0035; Sigma-Aldrich). Cells were treated  
346 with the proteasome inhibitor MG132 (ApexBio, Hsinchu, Taiwan, China) at 10 µM to inhibit  
347 proteasome-mediated degradation and with cycloheximide (ApexBio) at 50 µg/mL to inhibit  
348 translation. All cell lines were authenticated using short tandem repeat (STR) profiling before  
349 experiments.

### 350 **Patient information and tissue specimens**

351 We collected 10 adjacent normal and 150 cancer specimens that were histopathologically  
352 diagnosed at the Sun Yat-sen University Cancer Center from 2004 to 2012. All patients  
353 eligible for this study accepted surgery and were followed-up regularly. Detailed  
354 clinicopathological data and survival data were collected (Supplementary Table S1). The  
355 study was approved by the ethics committee of Sun Yat-sen University Cancer Center and  
356 was performed according to Declaration of Helsinki.

357 **Quantitative real-time PCR (qPCR)**

358 Total RNA was isolated from cells or human tissue using TRIzol (Invitrogen, Carlsbad, CA,  
359 USA) according to manufacturer's instructions. cDNA was synthesized from total RNA (2 µg)  
360 after adding RNase-free DNase. qPCR was performed in triplicate using 1 µL of cDNA in a  
361 standard SYBR premix Ex Taq (Takara, Shiga, Japan) on the CFX96 Real-Time PCR  
362 Detection System (Bio-Rad, Hercules, CA, USA). Glyceraldehyde-3-phosphate  
363 dehydrogenase (GAPDH) served as an internal control.

364 **Western blotting**

365 Total cellular proteins were extracted using Radioimmunoprecipitation assay lysis buffer  
366 (Thermo Scientific, Waltham, MA, USA) quantified using a Bio-Rad DC protein assay kit II,  
367 separated by electrophoresis on 8–15% SDS-PAGE gels and electro transferred onto a  
368 Hybond ECL transfer membrane (Amersham Pharmacia, Piscataway, NJ, USA). The  
369 membranes were blocked with 5% skimmed milk and incubated with the appropriate primary  
370 antibodies. The antigen-antibody complexes on the membrane were detected using labeled  
371 secondary antibodies and enhanced chemiluminescence reagents (Thermo Scientific). The  
372 antibodies and their dilutions were as follows: anti- PPP1R14C (#PA5-50996, dilution 1:1000,  
373 Invitrogen), anti- PP1 (#sc-7482, dilution 1:500, Santa Cruz Biotechnology, Sant Cruz, CA,  
374 USA), anti- GSK3β (#22104-1-AP, dilution 1:2000, Proteintech, Rosemont, IL, USA), anti-  
375 p-GSK3β (Ser9) (#9323, dilution 1:1000, CST, Danvers, MA, USA), anti- HA (H6908,  
376 dilution 1:1000, Sigma- Aldrich, St. Louis, MO, USA), anti- Flag (F7425, dilution 1:1000,  
377 Sigma- Aldrich), anti- MYC (05-724, dilution 1:1000, Sigma- Aldrich), anti- GAPDH (#5174,  
378 dilution 1:1000, CST), anti- p-p53 (Ser15) (MA5-15229, dilution 1:1000, Invitrogen), anti-

379 p-CREB (Ser133/Ser63) (MA1-114, dilution 1:1000, Invitrogen), anti- p-eIF2A (Ser51)  
380 (#3398, dilution 1:1000, CST), anti- p- Aurora A (Thr288) (MA5-14904, dilution 1:1000,  
381 Invitrogen), anti- p-Slug (S246) (ab63568, dilution 1: 500, Abcam), p- c-myc (T58)  
382 (ab185655, dilution 1:1000, Abcam), anti- c-Jun (Thr239) (PA5-104748, dilution 1:1000,  
383 Invitrogen) and anti- p-SMAD3 (S423/425) (#9520, dilution 1:1000, CST) and then exposed  
384 to horseradish peroxidase (HRP)-conjugated secondary anti-mouse or rabbit antibodies.  
385 Immunoreactive proteins were detected using enhanced chemiluminescence (ECL)  
386 (Amersham Pharmacia, Little Chalfont, UK).

### 387 **Immunohistochemistry**

388 IHC was performed to detect PPP1R14C in 10 adjacent normal and 150 breast cancer  
389 specimens using anti- PPP1R14C (#PA5-50996, Invitrogen) antibody. The staining index (SI)  
390 of tissues was evaluated using the intensity and proportion of positively stained tumor cells.  
391 Staining intensity was classified as follows: 0, no staining; 1, weak staining (light yellow); 2,  
392 moderate staining (yellow brown); 3, strong staining (brown). Scores of positively stained cell  
393 proportions were: 0, no positive; 1, < 10%; 2, 10–35%; 3, 35–75%; 4, > 75%. The levels of  
394 the indicated proteins were determined using the SI. The SI consisted of possible scores of 0,  
395 1, 2, 3, 4, 6, 8, 9 and 12. High and low expression of PPP1R14C were defined as an  $SI \geq 6$   
396 and  $SI < 6$ , respectively, according to the heterogeneity with the log-rank test statistics with  
397 respect to 5-year OS and RFS.

### 398 **Plasmids and generation of stably transfected cell lines**

399 Transient plasmid transfection was performed using Lipofectamine 3000 (Invitrogen)  
400 according to the manufacturer's instructions. To construct stable PPP1R14C-knockdown cells,

401 MDA-MB-231 and SUM159PT cell lines were infected with lentiviruses containing two  
402 different short hairpin RNAs targeting PPP1R14C (GeneChem, Shanghai, China). For  
403 overexpression, the full-length PPP1R14C cDNA was identified and cloned to generate a  
404 Flag- PPP1R14C construct. To construct stable PPP1R14C-overexpressing cells, lentiviruses  
405 were constructed, infected into MDA-MB-231 and SUM159PT cells, and selected using  
406 puromycin.

#### 407 **Colony formation assay**

408 Cells (400 per plate) were cultured in 6-well plates for 14 days. The formed colonies were  
409 fixed with ethanol, stained with 1% crystal violet, and counted.

#### 410 **Anchorage-independent growth ability assay**

411 MDA-MB-231 and SUM159PT cells were trypsinized and suspended in 0.66% agar (Sigma)  
412 plus 2 ml of DMEM (with 10% fetal bovine serum) in a 6-well plate (5000 cells per well).  
413 Cells mixed with culture medium were plated above a layer containing a mixture of 1.32%  
414 agar plus medium. Colonies were counted and photographed after 10 days.

#### 415 **Flow cytometry analysis**

416 Cell cycle was analysed on a flow cytometer FACScan instrument (Beckman Coulter, Brea,  
417 CA, USA). 20000 cells were washed, fixed, pelleted, and incubated in bovine pancreatic  
418 RNase (Sigma). The cells were then stained with propidium iodide (Sigma-Aldrich). The  
419 specific procedure was reported previously (Lin et al., 2010).

#### 420 **Immunoprecipitation assay**

421 Lysates were prepared from the indicated cancer cells using lysis buffer (150 mM NaCl, 10  
422 mM HEPES, [pH 7.4], 1% NP-40). The lysates were incubated with protein G agarose (IP04,

423 Millipore), Flag affinity agaros (A2220, Millipore) or HA affinity agarose (A2095, Millipore)  
424 overnight at 4 ° C. Beads containing affinity- bound proteins were washed six times with  
425 immunoprecipitation wash buffer (150 mM NaCl, 10 mM HEPES, [pH 7.4], and 0.1%  
426 NP-40), followed by elution with 1 M glycine [pH 3.0]. The eluates were then mixed with  
427 sample buffer, denatured, and electrophoresed for western blotting analysis.

#### 428 **Xenograft tumor models**

429 Female BALB/c-nu mice (5- 6 weeks old, 18- 20 g) were purchased and housed in barrier  
430 facilities on a 12-h light/dark cycle. The Institutional Animal Care and Use Committee of Sun  
431 Yat-sen University approved all the experimental procedures. To establish the subcutaneous  
432 xenograft model,  $1 \times 10^6$  SUM159PT-vector/scramble, -PPP1R14C, and -shPPP1R14C cells  
433 were injected subcutaneously into the fat pads of mice. The tumor volumes were determined  
434 every week. The tumor volume was calculated using the following equation:  $(L*W^2) / 2$  (L =  
435 length, W = width). The mice were sacrificed after 7 weeks, and the tumors were isolated and  
436 weighed. Serial 6.0- $\mu$ m sections were cut and stained with anti- PPP1R14C and anti- Ki-67  
437 (cat. no. ZM-0166; Zhongshanjinqiao Bio-Reagent Company) antibodies to determine the  
438 level of proliferation.

439 For lung colonization and spontaneous metastasis models, mice were randomly divided  
440 into groups (n = 6 per group), and intravenously or subcutaneously injected with  $2 \times 10^5$   
441 MDA-MB-231 and 4T1 cells. Bioluminescence imaging of tumor colonization and growth in  
442 lung tissues were evaluated using the Xenogen IVIS spectrum imagining system (Caliper Life  
443 Sciences, Hopkinton, MA, USA) as described previously[44]. To block the  
444 PPP1R14C/PP1/p-GSK3 $\beta$  axis, mice were injected intraperitoneally with C2 (100 mg/kg)

445 once per day[45]. 12 weeks later, the mice were killed, and lungs were removed and fixed in  
446 formalin and paraffin-embedded for hematoxylin and eosin staining. The number of lung  
447 metastases in each group was counted under five random low power fields and presented as  
448 the mean  $\pm$  S.D..

#### 449 **Statistical analysis**

450 Statistical analyses were performed using the SPSS version 19.0 statistical software package  
451 (IBM Corp., Armonk, NY, USA). The values presented are expressed as the mean with S.D..  
452 All experiments were performed at least in triplicate. Statistical tests for data analysis  
453 included two-tailed Student's t test, Mann-Whitney U test and  $\chi^2$  test. Kaplan-Meier  
454 methodology was used to evaluate survival probabilities and log-rank test was used to  
455 compare survival difference on univariate analysis. Multivariate statistical analysis was  
456 performed using a Cox regression model.  $P < 0.05$  was considered statistically significant. No  
457 statistical method was used to predetermine sample sizes; however, our sample sizes were  
458 similar to those reported in previous studies [44].

459

460 **Acknowledgements**

461 Not applicable.

462 **Author contributions**

463 Y.J., L.K. and H.X. carried out most of the experimental work. S.L. and D.S. conducted the  
464 immunofluorescence and IHC staining analysis. M.W. and Y.L. performed the IP assays. H.X.,  
465 Y.X. and M.Y. performed the western blotting and public datasets analysis. Y.J. , L.K. and Y.O.  
466 conducted the cell culture, stable cell line establishment and *in vitro* functional assays. X.H.  
467 and X.C. conducted the animal model experiments. Y.H. and X.C. collected the clinical  
468 samples and patient information. P.L. and W.W. conceived of the project, designed most of the  
469 experiments, wrote the manuscript, and supervised project.

470 **Funding**

471 This work was supported by the National Natural Science Foundation of China [grant  
472 numbers 81772800, 82072945, 82003052, 82003128 and 81802405]; the Natural Science  
473 Foundation of Guangdong Province [grant numbers 2020A1515010260]; and the China  
474 Postdoctoral Science Foundation [grant number 2019M663290].

475 **Competing Interests**

476 The authors declare no competing interests.

477

## 478 **References:**

- 479 1 Foulkes WD, Smith IE, Reis-Filho JS (2010). Triple-negative breast cancer. *N Engl J Med* **363**: 1938-1948.  
480 Doi: 10.1056/NEJMra1001389
- 481 2 Waks AG, Winer EP (2019). Breast Cancer Treatment: A Review. *JAMA* **321**: 288-300. Doi:  
482 10.1001/jama.2018.19323
- 483 3 Malorni L, Shetty PB, De Angelis C, Hilsenbeck S, Rimawi MF, Elledge R *et al* (2012). Clinical and  
484 biologic features of triple-negative breast cancers in a large cohort of patients with long-term follow-up.  
485 *Breast Cancer Res Treat* **136**: 795-804. Doi: 10.1007/s10549-012-2315-y
- 486 4 Pareja F, Reis-Filho JS (2018). Triple-negative breast cancers - a panoply of cancer types. *Nat Rev Clin*  
487 *Oncol* **15**: 347-348. Doi: 10.1038/s41571-018-0001-7
- 488 5 Beurel E, Grieco SF, Jope RS (2015). Glycogen synthase kinase-3 (GSK3): regulation, actions, and diseases.  
489 *Pharmacol Ther* **148**: 114-131. Doi: 10.1016/j.pharmthera.2014.11.016
- 490 6 Hur EM, Zhou FQ (2010). GSK3 signalling in neural development. *Nat Rev Neurosci* **11**: 539-551. Doi:  
491 10.1038/nrn2870
- 492 7 Bonnet S, Paulin R, Sutendra G, Dromparis P, Roy M, Watson KO *et al* (2009). Dehydroepiandrosterone  
493 reverses systemic vascular remodeling through the inhibition of the Akt/GSK3- $\beta$ /NFAT axis.  
494 *Circulation* **120**: 1231-1240. Doi: 10.1161/CIRCULATIONAHA.109.848911
- 495 8 Maurer U, Preiss F, Brauns-Schubert P, Schlicher L, Charvet C (2014). GSK-3 - at the crossroads of cell  
496 death and survival. *J Cell Sci* **127**: 1369-1378. Doi: 10.1242/jcs.138057
- 497 9 Robertson H, Hayes JD, Sutherland C (2018). A partnership with the proteasome; the destructive nature of  
498 GSK3. *Biochem Pharmacol* **147**: 77-92. Doi: 10.1016/j.bcp.2017.10.016
- 499 10 Guo X, Ramirez A, Waddell DS, Li Z, Liu X, Wang XF (2008). Axin and GSK3- control Smad3 protein  
500 stability and modulate TGF- signaling. *Genes Dev* **22**: 106-120. Doi: 10.1101/gad.1590908
- 501 11 Huber AL, Papp SJ, Chan AB, Henriksson E, Jordan SD, Kriebs A *et al* (2016). CRY2 and FBXL3  
502 Cooperatively Degrade c-MYC. *Mol Cell* **64**: 774-789. Doi: 10.1016/j.molcel.2016.10.012
- 503 12 Kazi A, Xiang S, Yang H, Delitto D, Trevino J, Jiang RHY *et al* (2018). GSK3 suppression upregulates  
504 beta-catenin and c-Myc to abrogate KRas-dependent tumors. *Nat Commun* **9**: 5154. Doi:  
505 10.1038/s41467-018-07644-6
- 506 13 Taira N, Mimoto R, Kurata M, Yamaguchi T, Kitagawa M, Miki Y *et al* (2012). DYRK2 priming  
507 phosphorylation of c-Jun and c-Myc modulates cell cycle progression in human cancer cells. *J Clin*  
508 *Invest* **122**: 859-872. Doi: 10.1172/JCI60818
- 509 14 Jeon YK, Kim CK, Hwang KR, Park HY, Koh J, Chung DH *et al* (2017). Pellino-1 promotes lung  
510 carcinogenesis via the stabilization of Slug and Snail through K63-mediated polyubiquitination. *Cell*  
511 *Death Differ* **24**: 469-480. Doi: 10.1038/cdd.2016.143
- 512 15 Wu PK, Hong SK, Park JI (2017). Steady-State Levels of Phosphorylated Mitogen-Activated Protein  
513 Kinase Kinase 1/2 Determined by Mortalin/HSPA9 and Protein Phosphatase 1 Alpha in KRAS and  
514 BRAF Tumor Cells. *Mol Cell Biol* **37**. Doi: 10.1128/MCB.00061-17
- 515 16 Hernandez F, Langa E, Cuadros R, Avila J, Villanueva N (2010). Regulation of GSK3 isoforms by  
516 phosphatases PP1 and PP2A. *Mol Cell Biochem* **344**: 211-215. Doi: 10.1007/s11010-010-0544-0
- 517 17 Rostas JW, 3rd, Pruitt HC, Metge BJ, Mitra A, Bailey SK, Bae S *et al* (2014). microRNA-29 negatively  
518 regulates EMT regulator N-myc interactor in breast cancer. *Mol Cancer* **13**: 200. Doi:  
519 10.1186/1476-4598-13-200
- 520 18 Cao Q, Lu X, Feng YJ (2006). Glycogen synthase kinase-3 $\beta$  positively regulates the proliferation of  
521 human ovarian cancer cells. *Cell Res* **16**: 671-677. Doi: 10.1038/sj.cr.7310078



- 522 19 Bai L, Yu Z, Zhang J, Yuan S, Liao C, Jeyabal PV *et al* (2016). OLA1 contributes to  
523 epithelial-mesenchymal transition in lung cancer by modulating the GSK3beta/snail/E-cadherin  
524 signaling. *Oncotarget* **7**: 10402-10413. Doi: 10.18632/oncotarget.7224
- 525 20 Liu QR, Zhang PW, Zhen Q, Walther D, Wang XB, Uhl GR (2002). KEPI, a PKC-dependent protein  
526 phosphatase 1 inhibitor regulated by morphine. *J Biol Chem* **277**: 13312-13320. Doi:  
527 10.1074/jbc.M107558200
- 528 21 Erdodi F, Kiss E, Walsh MP, Stefansson B, Deng JT, Eto M *et al* (2003). Phosphorylation of protein  
529 phosphatase type-1 inhibitory proteins by integrin-linked kinase and cyclic nucleotide-dependent  
530 protein kinases. *Biochem Biophys Res Commun* **306**: 382-387. Doi: 10.1016/s0006-291x(03)00976-8
- 531 22 Horvath D, Tamas I, Sipos A, Darula Z, Becsi B, Nagy D *et al* (2017). Myosin phosphatase and  
532 RhoA-activated kinase modulate neurotransmitter release by regulating SNAP-25 of SNARE complex.  
533 *PLoS One* **12**: e0177046. Doi: 10.1371/journal.pone.0177046
- 534 23 Dedinszki D, Kiss A, Markasz L, Marton A, Toth E, Szekely L *et al* (2015). Inhibition of protein  
535 phosphatase-1 and -2A decreases the chemosensitivity of leukemic cells to chemotherapeutic drugs.  
536 *Cell Signal* **27**: 363-372. Doi: 10.1016/j.cellsig.2014.11.021
- 537 24 Felgueiras J, Jeronimo C, Fardilha M (2020). Protein phosphatase 1 in tumorigenesis: is it worth a closer  
538 look? *Biochim Biophys Acta Rev Cancer* **1874**: 188433. Doi: 10.1016/j.bbcan.2020.188433
- 539 25 Haneda M, Kojima E, Nishikimi A, Hasegawa T, Nakashima I, Isobe K (2004). Protein phosphatase 1, but  
540 not protein phosphatase 2A, dephosphorylates DNA-damaging stress-induced phospho-serine 15 of p53.  
541 *FEBS Lett* **567**: 171-174. Doi: 10.1016/j.febslet.2004.04.066
- 542 26 Choe ES, Parelkar NK, Kim JY, Cho HW, Kang HS, Mao L *et al* (2004). The protein phosphatase 1/2A  
543 inhibitor okadaic acid increases CREB and Elk-1 phosphorylation and c-fos expression in the rat  
544 striatum in vivo. *J Neurochem* **89**: 383-390. Doi: 10.1111/j.1471-4159.2003.02334.x
- 545 27 Figueiredo J, da Cruz ESOA, Fardilha M (2014). Protein phosphatase 1 and its complexes in carcinogenesis.  
546 *Curr Cancer Drug Targets* **14**: 2-29. Doi: 10.2174/15680096113136660106
- 547 28 Kopnisky KL, Chalecka-Franaszek E, Gonzalez-Zulueta M, Chuang DM (2003). Chronic lithium treatment  
548 antagonizes glutamate-induced decrease of phosphorylated CREB in neurons via reducing protein  
549 phosphatase 1 and increasing MEK activities. *Neuroscience* **116**: 425-435. Doi:  
550 10.1016/s0306-4522(02)00573-0
- 551 29 O'Loughlen A, Perez-Morgado MI, Salinas M, Martin ME (2003). Reversible inhibition of the protein  
552 phosphatase 1 by hydrogen peroxide. Potential regulation of eIF2 alpha phosphorylation in  
553 differentiated PC12 cells. *Arch Biochem Biophys* **417**: 194-202. Doi: 10.1016/s0003-9861(03)00368-0
- 554 30 Liu Y, Tao S, Liao L, Li Y, Li H, Li Z *et al* (2020). TRIM25 promotes the cell survival and growth of  
555 hepatocellular carcinoma through targeting Keap1-Nrf2 pathway. *Nature Communications* **11**. Doi:  
556 10.1038/s41467-019-14190-2
- 557 31 Lim JW, Kim SK, Choi SY, Kim DH, Gadhe CG, Lee HN *et al* (2018). Identification of crizotinib  
558 derivatives as potent SHIP2 inhibitors for the treatment of Alzheimer's disease. *Eur J Med Chem* **157**:  
559 405-422. Doi: 10.1016/j.ejmech.2018.07.071
- 560 32 Ko R, Park JH, Ha H, Choi Y, Lee SY (2015). Glycogen synthase kinase 3beta ubiquitination by TRAF6  
561 regulates TLR3-mediated pro-inflammatory cytokine production. *Nat Commun* **6**: 6765. Doi:  
562 10.1038/ncomms7765
- 563 33 Li Y, Wu H, Wu W, Zhuo W, Liu W, Zhang Y *et al* (2014). Structural insights into the TRIM family of  
564 ubiquitin E3 ligases. *Cell Res* **24**: 762-765. Doi: 10.1038/cr.2014.46
- 565 34 Kim JY, Kim DS, Auh QS, Yi JK, Moon SU, Kim EC (2017). Role of Protein Phosphatase 1 in  
566 Angiogenesis and Odontoblastic Differentiation of Human Dental Pulp Cells. *J Endod* **43**: 417-424. Doi:

- 567 10.1016/j.joen.2016.10.013
- 568 35 Bianchini G, Balko JM, Mayer IA, Sanders ME, Gianni L (2016). Triple-negative breast cancer: challenges  
569 and opportunities of a heterogeneous disease. *Nat Rev Clin Oncol* **13**: 674-690. Doi:  
570 10.1038/nrclinonc.2016.66
- 571 36 Harbeck N, Gnant M (2017). Breast cancer. *Lancet* **389**: 1134-1150. Doi: 10.1016/S0140-6736(16)31891-8
- 572 37 Jacobs KM, Bhawe SR, Ferraro DJ, Jaboin JJ, Hallahan DE, Thotala D (2012). GSK-3beta: A Bifunctional  
573 Role in Cell Death Pathways. *Int J Cell Biol* **2012**: 930710. Doi: 10.1155/2012/930710
- 574 38 Patel P, Woodgett JR (2017). Glycogen Synthase Kinase 3: A Kinase for All Pathways? *Curr Top Dev Biol*  
575 **123**: 277-302. Doi: 10.1016/bs.ctdb.2016.11.011
- 576 39 Ceulemans H, Stalmans W, Bollen M (2002). Regulator-driven functional diversification of protein  
577 phosphatase-1 in eukaryotic evolution. *Bioessays* **24**: 371-381. Doi: 10.1002/bies.10069
- 578 40 Wenzel K, Daskalow K, Herse F, Seitz S, Zacharias U, Schenk JA *et al* (2007). Expression of the protein  
579 phosphatase 1 inhibitor KEPI is downregulated in breast cancer cell lines and tissues and involved in  
580 the regulation of the tumor suppressor EGR1 via the MEK-ERK pathway. *Biol Chem* **388**: 489-495.  
581 Doi: 10.1515/BC.2007.062
- 582 41 Ammosova T, Platonov M, Yedavalli VR, Obukhov Y, Gordeuk VR, Jeang KT *et al* (2012). Small  
583 molecules targeted to a non-catalytic "RVxF" binding site of protein phosphatase-1 inhibit HIV-1. *PLoS*  
584 *One* **7**: e39481. Doi: 10.1371/journal.pone.0039481
- 585 42 Verbinnen I, Ferreira M, Bollen M (2017). Biogenesis and activity regulation of protein phosphatase 1.  
586 *Biochem Soc Trans* **45**: 89-99. Doi: 10.1042/BST20160154
- 587 43 Alessi D, MacDougall LK, Sola MM, Ikebe M, Cohen P (1992). The control of protein phosphatase-1 by  
588 targetting subunits. The major myosin phosphatase in avian smooth muscle is a novel form of protein  
589 phosphatase-1. *Eur J Biochem* **210**: 1023-1035. Doi: 10.1111/j.1432-1033.1992.tb17508.x
- 590 44 Lin C, Liao W, Jian Y, Peng Y, Zhang X, Ye L *et al* (2017). CGI-99 promotes breast cancer metastasis via  
591 autocrine interleukin-6 signaling. *Oncogene* **36**: 3695-3705. Doi: 10.1038/onc.2016.525
- 592 45 Che J, Huang Y, Xu C, Zhang P (2017). Increased ceramide production sensitizes breast cancer cell  
593 response to chemotherapy. *Cancer Chemother Pharmacol* **79**: 933-941. Doi:  
594 10.1007/s00280-017-3292-y
- 595
- 596

597 **Figure legends**

**Figure 1**

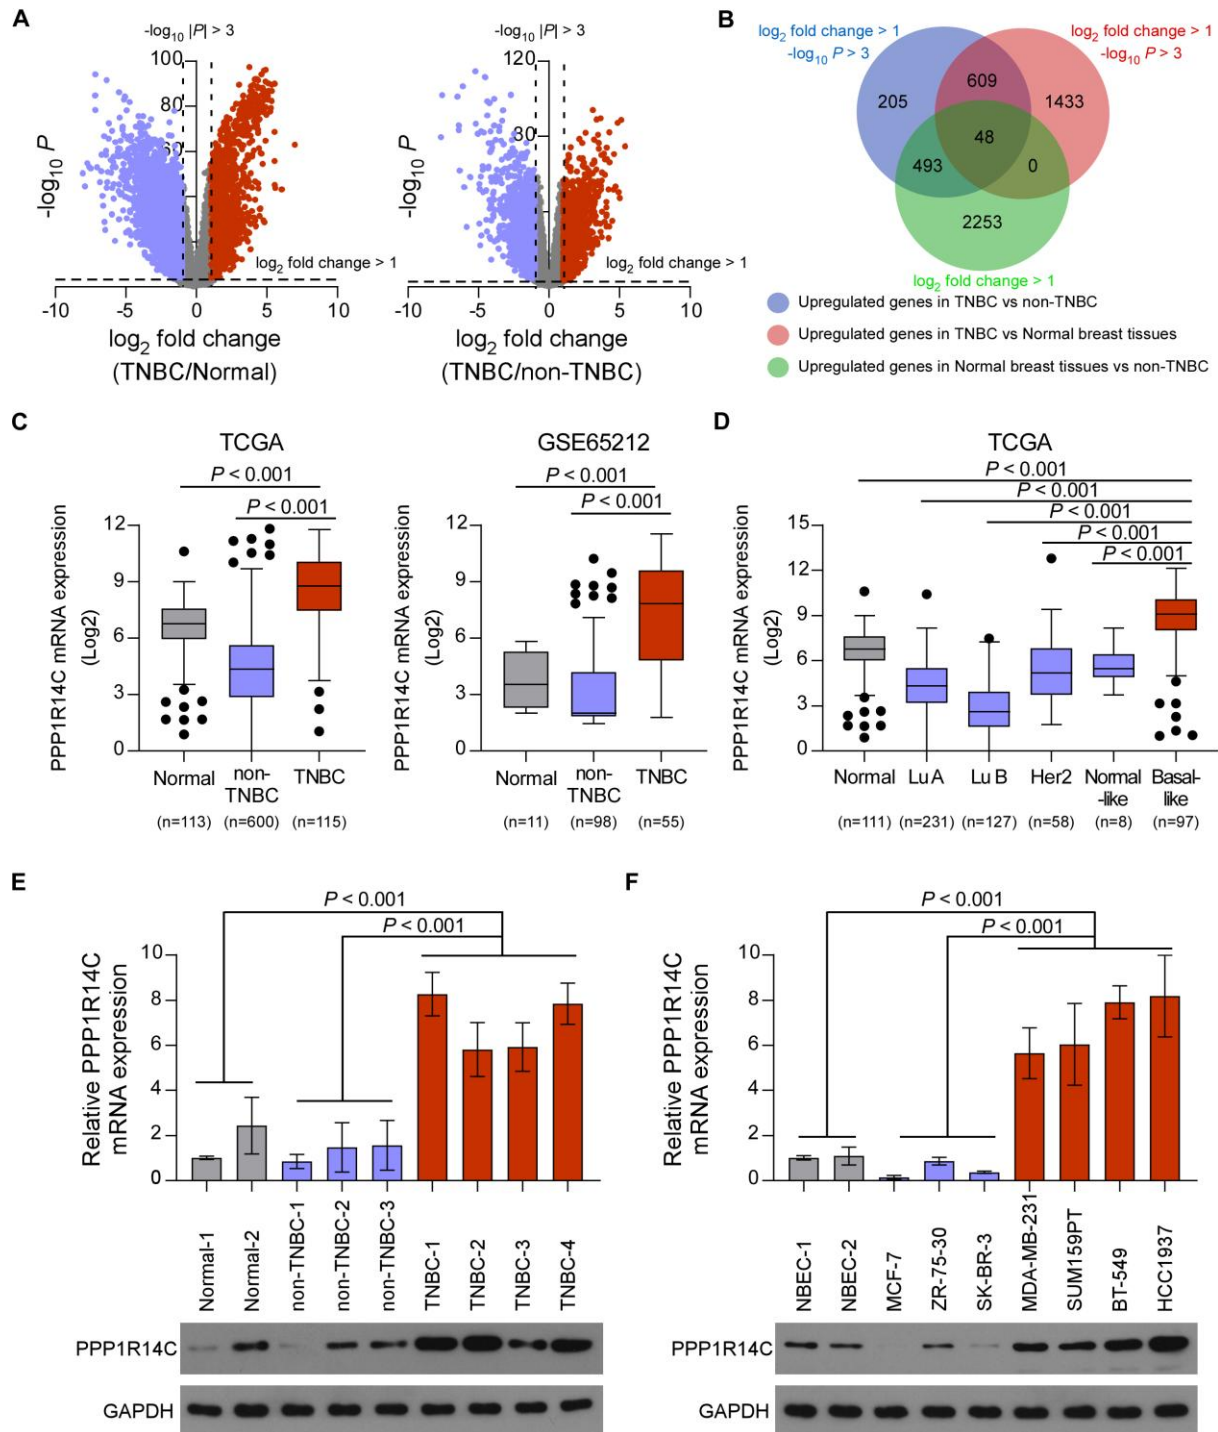

598

599 **Figure 1. PPP1R14C is specifically upregulated in TNBC.** (A) Volcano plot for gene  
600 expression in The Cancer Genome Atlas (TCGA) breast cancer dataset by comparing TNBC  
601 and normal tissues (left panel), and comparing TNBC and non-TNBC (right panel). The blue

602 dots represent the downregulated genes and red dots represent the upregulated genes  
603 dysregulated in TNBC compared to normal samples/ non-TNBC. **(B)** A Venn diagram among  
604 upregulated genes in TNBC compared to non-TNBC, TNBC compared to normal samples,  
605 and normal tissues compared to non-TNBC. **(C)** PPP1R14C mRNA expression levels in The  
606 Cancer Genome Atlas (TCGA) breast cancer dataset (including 113 normal, 115 TNBC, and  
607 600 non-TNBC samples) and Gene expression Omnibus (GEO) dataset (GSE65212,  
608 including 11 normal, 55 TNBC, and 98 non-TNBC samples). **(D)** PPP1R14C mRNA  
609 expression levels in tumor samples with informed molecular subtypes from TCGA breast  
610 cancer dataset. Statistic analysis was normalized to the expression levels in basal-like  
611 subgroup. Lu A, luminal A; Lu B, luminal B. **(E and F)** Real-time PCR (up) and western  
612 blot (down) analysis of PPP1R14C expression in human breast cancer tissues (E) and cell  
613 lines (F). GAPDH was used as a loading control. Data represent the means  $\pm$  S.D. of three  
614 independent experiments.

615

616

**Figure 2**

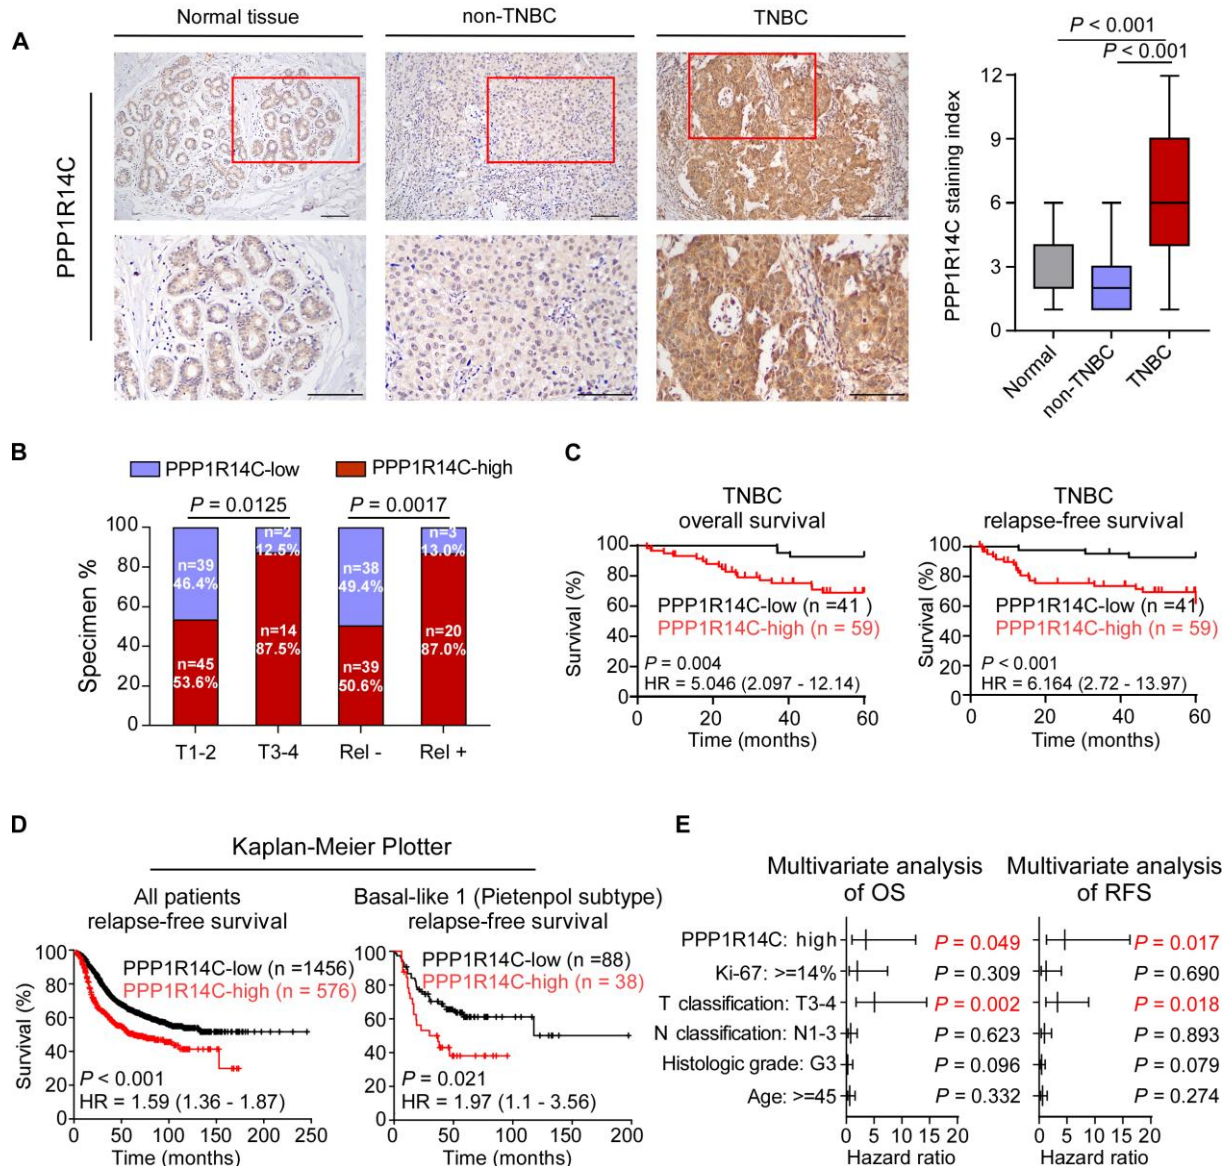

617

618 **Figure 2. Upregulation of PPP1R14C is associated with poor prognosis in TNBC. (A)**

619 Representative images of PPP1R14C staining in normal breast tissues, non-TNBC and TNBC

620 tissues. The SI distribution of each group was indicated (right panel) and Mann-Whitney U

621 test was used for analysis. Scale bars represent 100  $\mu$ m. (B) The distribution and correlation

622 between PPP1R14C staining and T classification and relapse status in patients with TNBC.

623 The  $\chi^2$  test was used for analysis. Rel -, no relapse; Rel +, with relapse. (C) Kaplan-Meier

624 5-year overall survival and relapse-free survival curve for patients with TNBC stratified by

625 low (n = 41) and high PPP1R14C expression (n = 59, log-rank test). HR, hazard ratio. (D)

626 The Kaplan- Meier Plotter (<http://kmplot.com/analysis>) program was used to analyze  
627 relapse-free survival of all breast cancer patients and basal-like subgroup (Pietenpol subtype).  
628 All settings were left at default values except for: gene symbol (PPP1R14C), survival (RFS),  
629 and auto select best cutoff (on). **(E)** Multivariate Cox regression analysis to evaluate the  
630 significance of the association between PPP1R14C signature, and OS and RFS in the presence  
631 of other clinical variables.

632

**Figure 3**

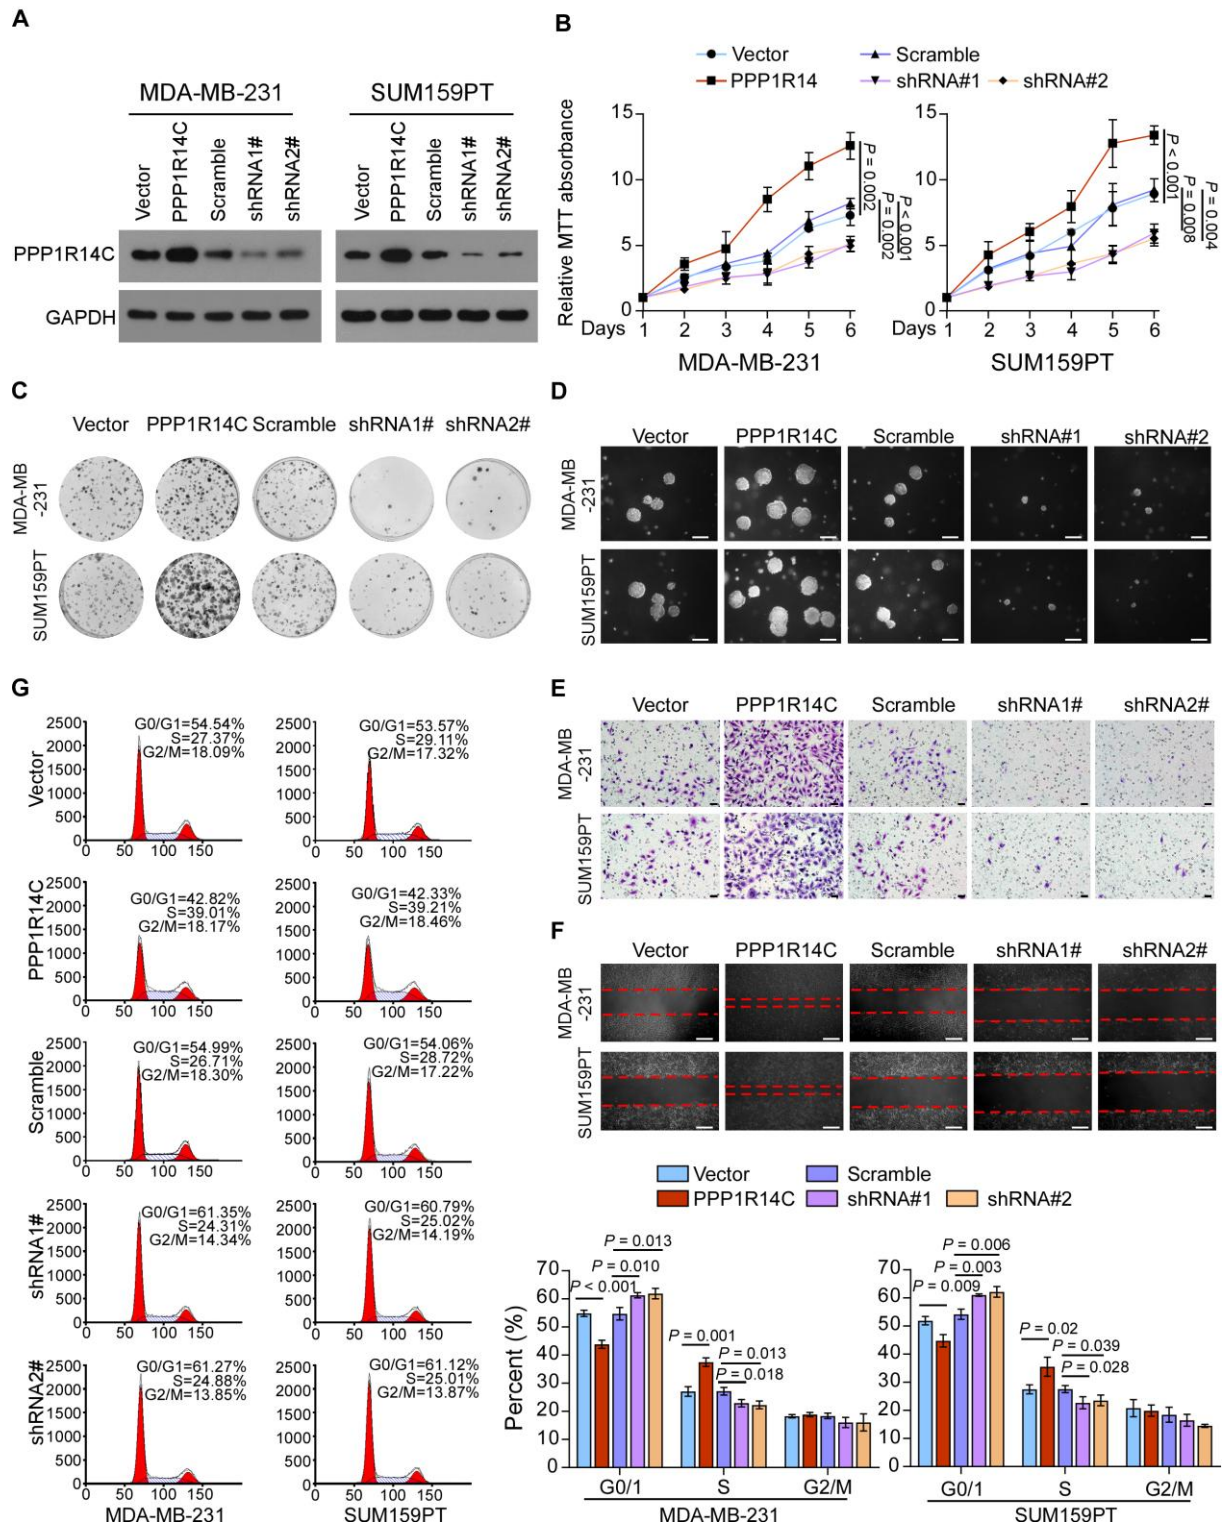

633

634 **Figure 3. PPP1R14C promotes tumor progression in TNBC cells *in vitro*.** (A) Western

635 blotting analysis of PPP1R14C in MDA-MB-231 and SUM159PT cells stably transduced

636 with PPP1R14C-overexpressing and PPP1R14C-silencing plasmids. GAPDH was used as a

637 loading control. **(B-G)** MTT (B), colony formation (C), soft agar (D), transwell (E), wound  
638 healing (F) assays and flow cytometric analysis (G) were performed in the indicated cells.  
639 Scale bars represent 50  $\mu\text{m}$ . Two-tailed Student's t test was used. Data represent the means  $\pm$   
640 S.D. of three independent experiments.  
641



**Figure 4**

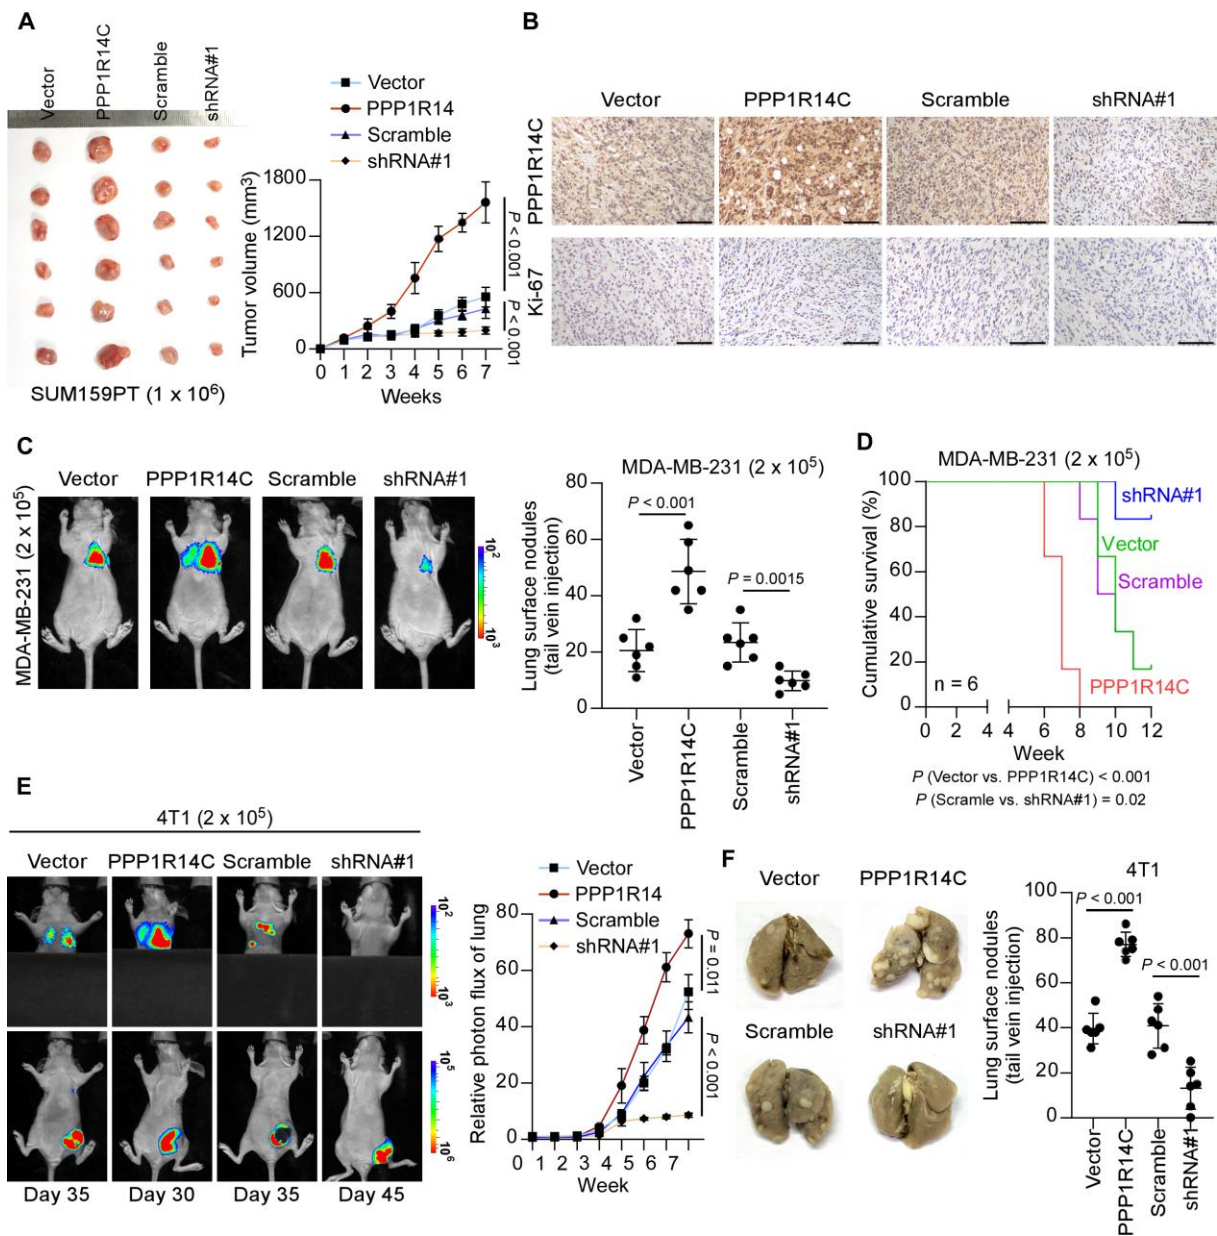

642

643 **Figure 4. PPP1R14C contributes to TNBC tumorigenesis and metastasis. (A)**

644 PPP1R14C-overexpressing, PPP1R14C-silenced and vector/scramble SUM159PT cell lines

645 were subcutaneously injected into mice (1 × 10<sup>6</sup>/injection, n = 6/group). The tumor volumes

646 in each group are shown. Data represent the means ± S.D. of three independent experiments.

647 **(B)** IHC of Ki-67 staining showed in the indicated xenografts. Scale bars represent 100 μm.

648 **(C)** *In vivo* metastasis assays of PPP1R14C-overexpressing, PPP1R14C-silenced and

649 vector/scramble MDA-MB-231 cells. Lung metastasis burden of xenografted animals was

650 monitored weekly using bioluminescent imaging (BLI). Representative BLI images of the  
651 lungs were shown. The visible surface metastatic lesions were counted. **(D)** Kaplan–Meier  
652 survival curves of mice. **(E)** Lung colonization and spontaneous metastasis models of  
653 PPP1R14C-overexpressing, PPP1R14C-silenced and vector/scramble 4T1 cells. BLI  
654 quantification of lung metastasis of the indicated cells. **(F)** The visible surface metastatic  
655 lesions of lungs were counted. Two-tailed Student’s t test and log-rank test were used.  
656

**Figure 5**

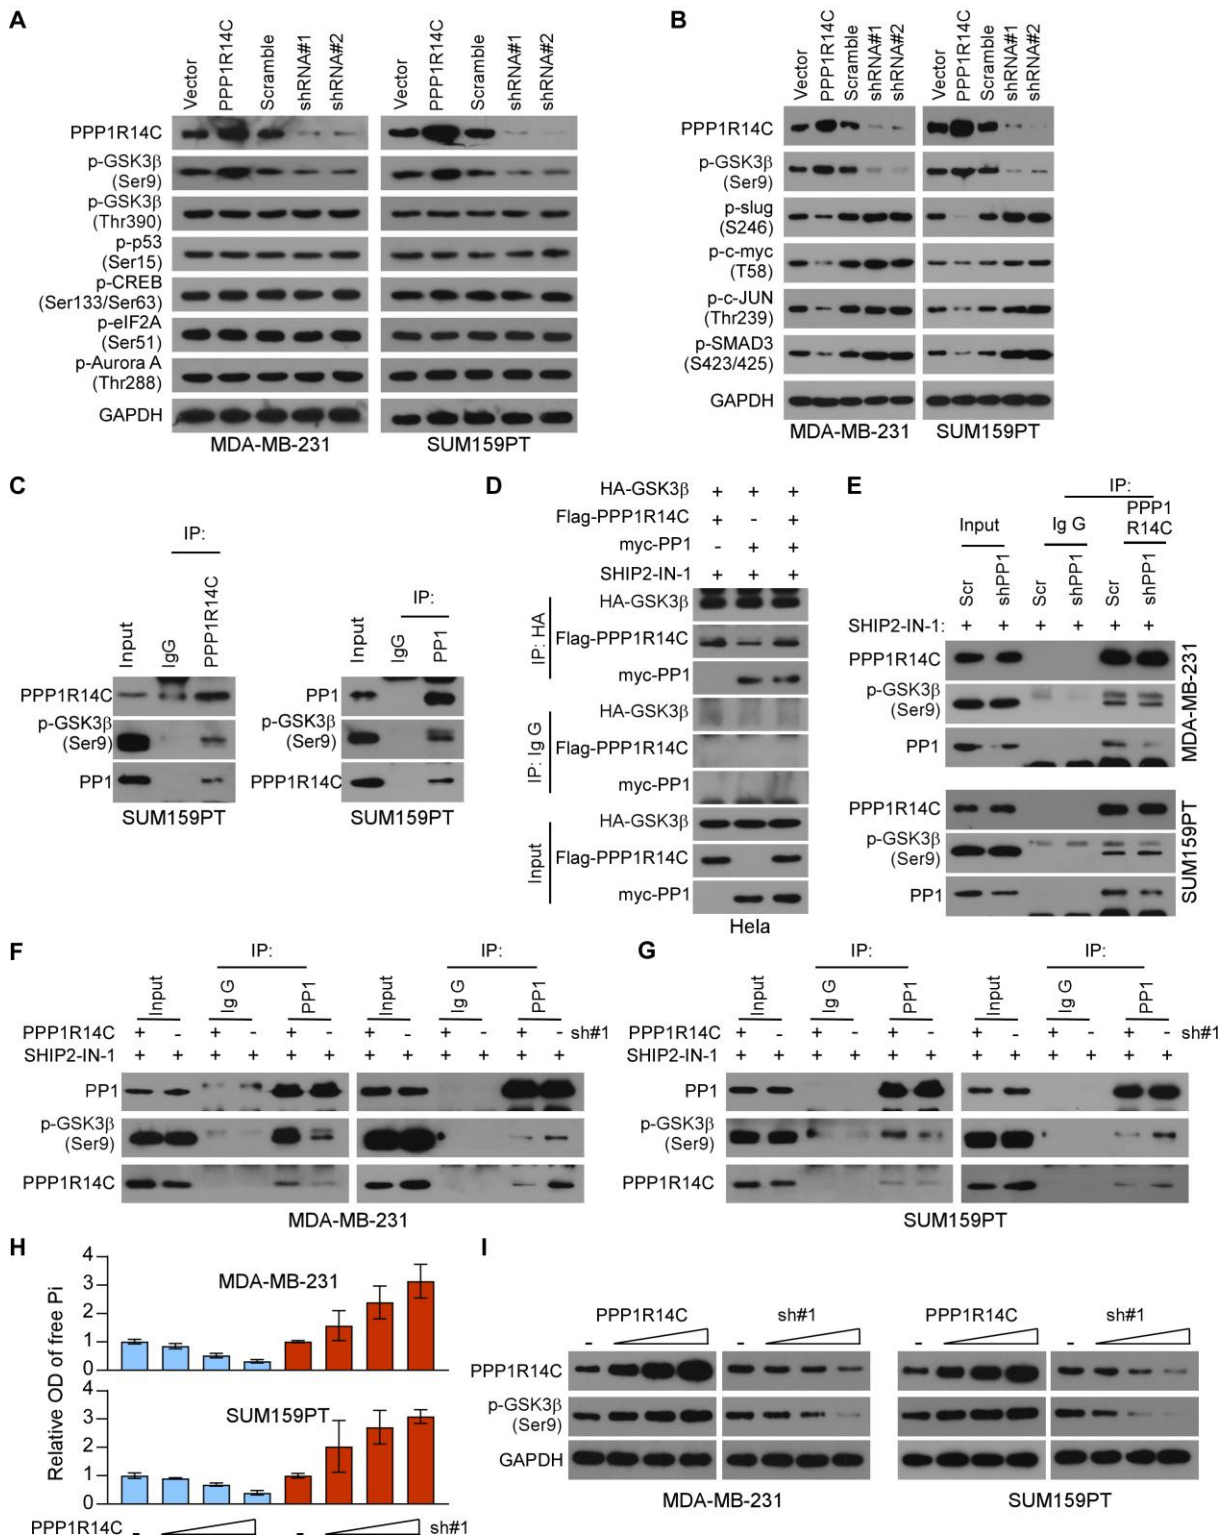

657

658 **Figure 5. PPP1R14C interacts with PP1 to constantly inhibit GSK3β activity. (A)**

659 Western blot analysis of PPP1R14C, p-GSK3β (Ser9), p-p53 (Ser15), p-CREB

660 (Ser133/Ser63), p-eIF2A (Ser51), and p-Aurora A (Thr288) in PPP1R14C-transduced cells

661 and PPP1R14C-silenced cells compared with control cells. GAPDH was used as a loading  
662 control. **(B)** Western blot analysis of PPP1R14C, p-GSK3 $\beta$  (Ser9), p-slug (S246), p-c-myc  
663 (T58), p-c-Jun (Thr239), and p-SMAD3 (S423/425) in PPP1R14C-transduced cells and  
664 PPP1R14C-silenced cells compared with control cells. GAPDH was used as a loading control.  
665 **(C)** Reciprocal immunoprecipitation (IP) assay revealed the interaction of PPP1R14C, PP1  
666 and p-GSK3 $\beta$  (Ser9) in SUM159PT cells. **(D)** Extraneous IP assay showed that the  
667 specifically interaction of PPP1R14C/PP1 with p-GSK3 $\beta$  (Ser9) under SHIP2-IN-1 treatment  
668 (10  $\mu$ M, 24 hours). **(E)** Endogenous IP assay showed that PPP1R14C bound to p-GSK3 $\beta$   
669 (Ser9) in a PP1-independent manner. **(F-G)** IP assays performed in TNBC cells treated under  
670 SHIP2-IN-1 with and without PPP1R14C-overexpressed or -silenced were subjected to  
671 immunoprecipitation with an anti-PP1 antibody followed by western blotting with the  
672 indicated antibodies. **(H)** The phosphatase activity of PP1 was measured by detecting its  
673 product, free Pi in the TNBC cells transfected with increased dose of PPP1R14C-expressing  
674 or PPP1R14C-shRNA plasmids. **(I)** The expression of p-GSK3 $\beta$  (Ser9) was detected by  
675 western blot assay in the TNBCs transfected with increased dose of PPP1R14C-expressing or  
676 PPP1R14C-shRNA plasmids. GAPDH was used as a loading control. The number of  
677 technical and biological replicates performed for the above assays depicted was three.

678

**Figure 6**

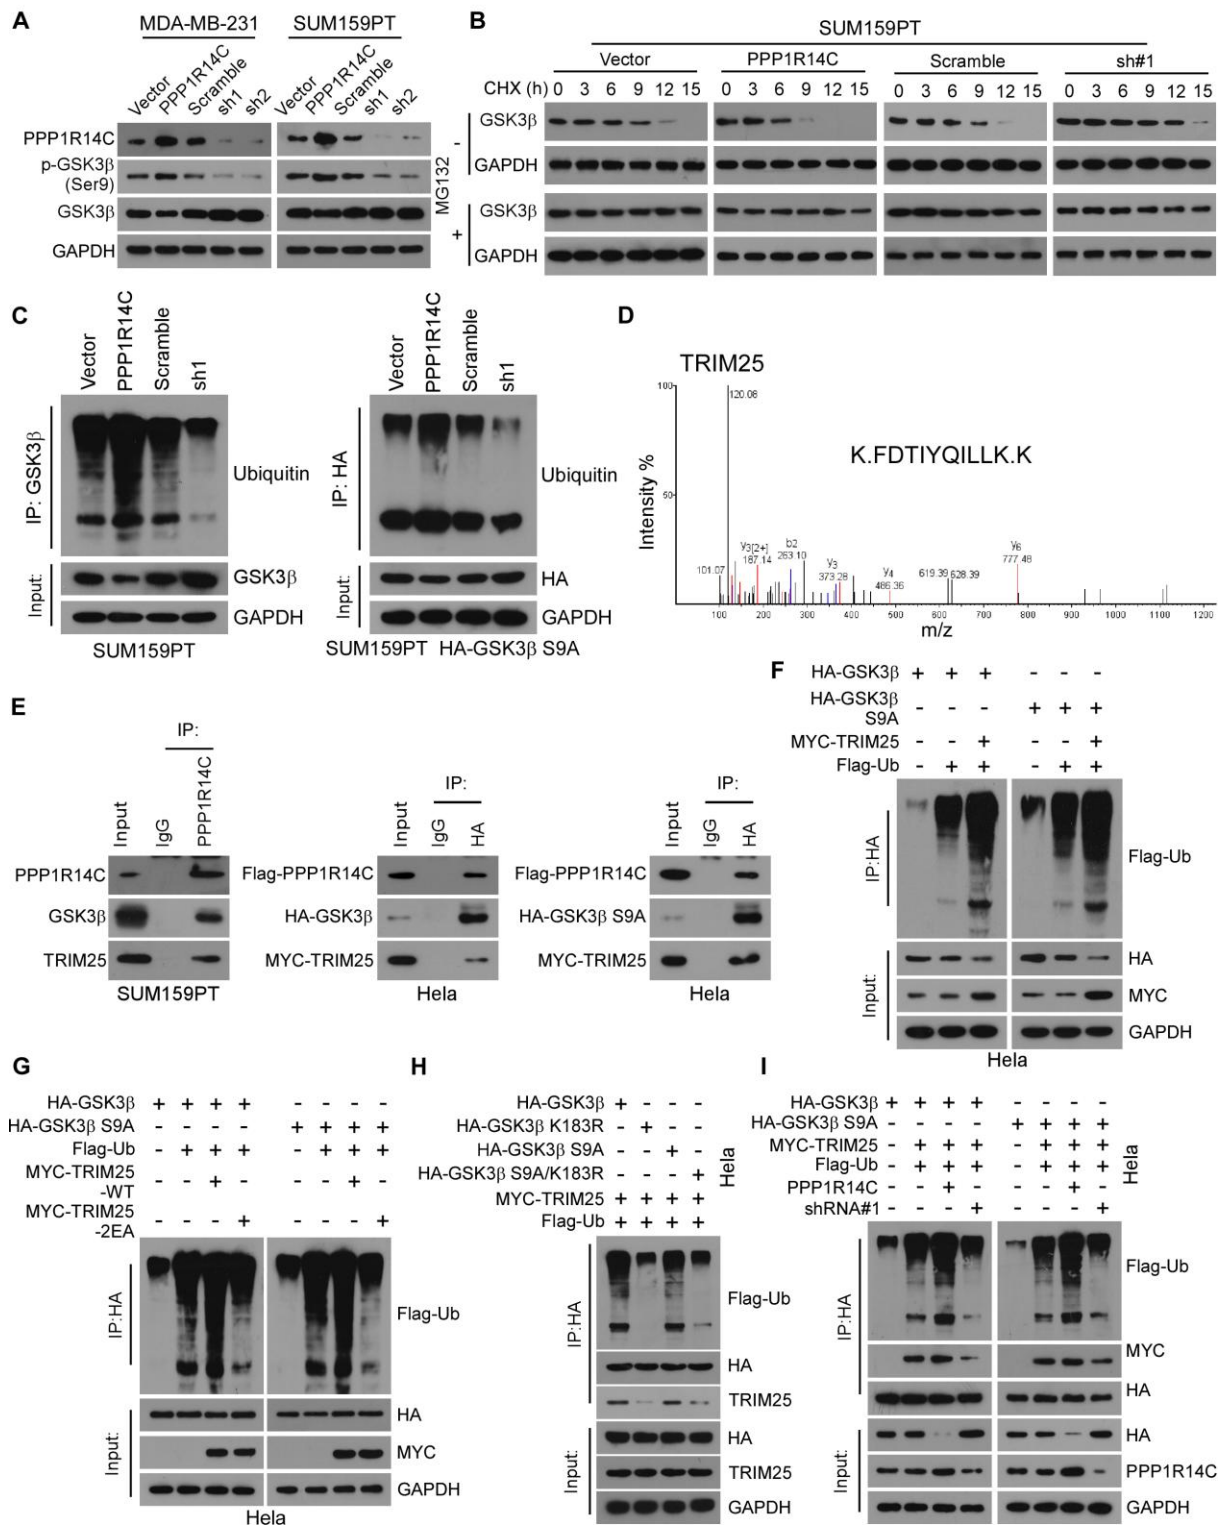

679

680 **Figure 6. PPP1R14C accelerates non-phosphorylated GSK3β (S9A) degradation. (A)**

681 Western blot analysis of PPP1R14C, p-GSK3β (Ser9), and GSK3β in

682 PPP1R14C-overexpressed cells and PPP1R14C-silenced cells compared with control cells.

683 GAPDH was used as a loading control. **(B)** Western blot analysis of GSK3 $\beta$  protein in  
684 SUM159PT cells treated with CHX (50  $\mu$ g/mL) for 0, 30, 60, or 120 min plus with or without  
685 MG132 (10  $\mu$ M) treatment. GAPDH was used as loading control. **(C)** Effect of ubiquitination  
686 on GSK3 $\beta$  and non-phosphorylated GSK3 $\beta$  (S9A) by immunoprecipitation assay in  
687 SUM159PT or SUM159PT-HA-GSK3 $\beta$  (S9A) cells using anti- GSK3 $\beta$  or anti-HA antibody  
688 to pull down, respectively. **(D)** Representative MS plots and sequences of peptides from  
689 TRIM25. **(E)** Immunoprecipitation (IP) assay revealed the interaction between PPP1R14C,  
690 TRIM25 and GSK3 $\beta$ / non-phosphorylated GSK3 $\beta$  (S9A) in SUM159PT and HeLa cells. **(F)**  
691 HeLa cells transfected with HA-GSK3 $\beta$ , non-phosphorylated HA-GSK3 $\beta$  (S9A) and Flag-Ub  
692 along with MYC-TRIM25 plasmids were subjected to immunoprecipitation with an anti-HA  
693 antibody followed by western blotting with an anti-Flag antibody. **(G)** HeLa cells transfected  
694 with the plasmids as indicated were subjected to IP assay with an anti-HA antibody followed  
695 by western blotting with an anti-Flag antibody. **(H-I)** HeLa cells transfected with the plasmids  
696 as indicated were subjected to IP assay with an anti-HA antibody followed by western blotting  
697 with the indicated antibodies. The number of technical and biological replicates performed for  
698 the above assays depicted was three.

699

**Figure 7**

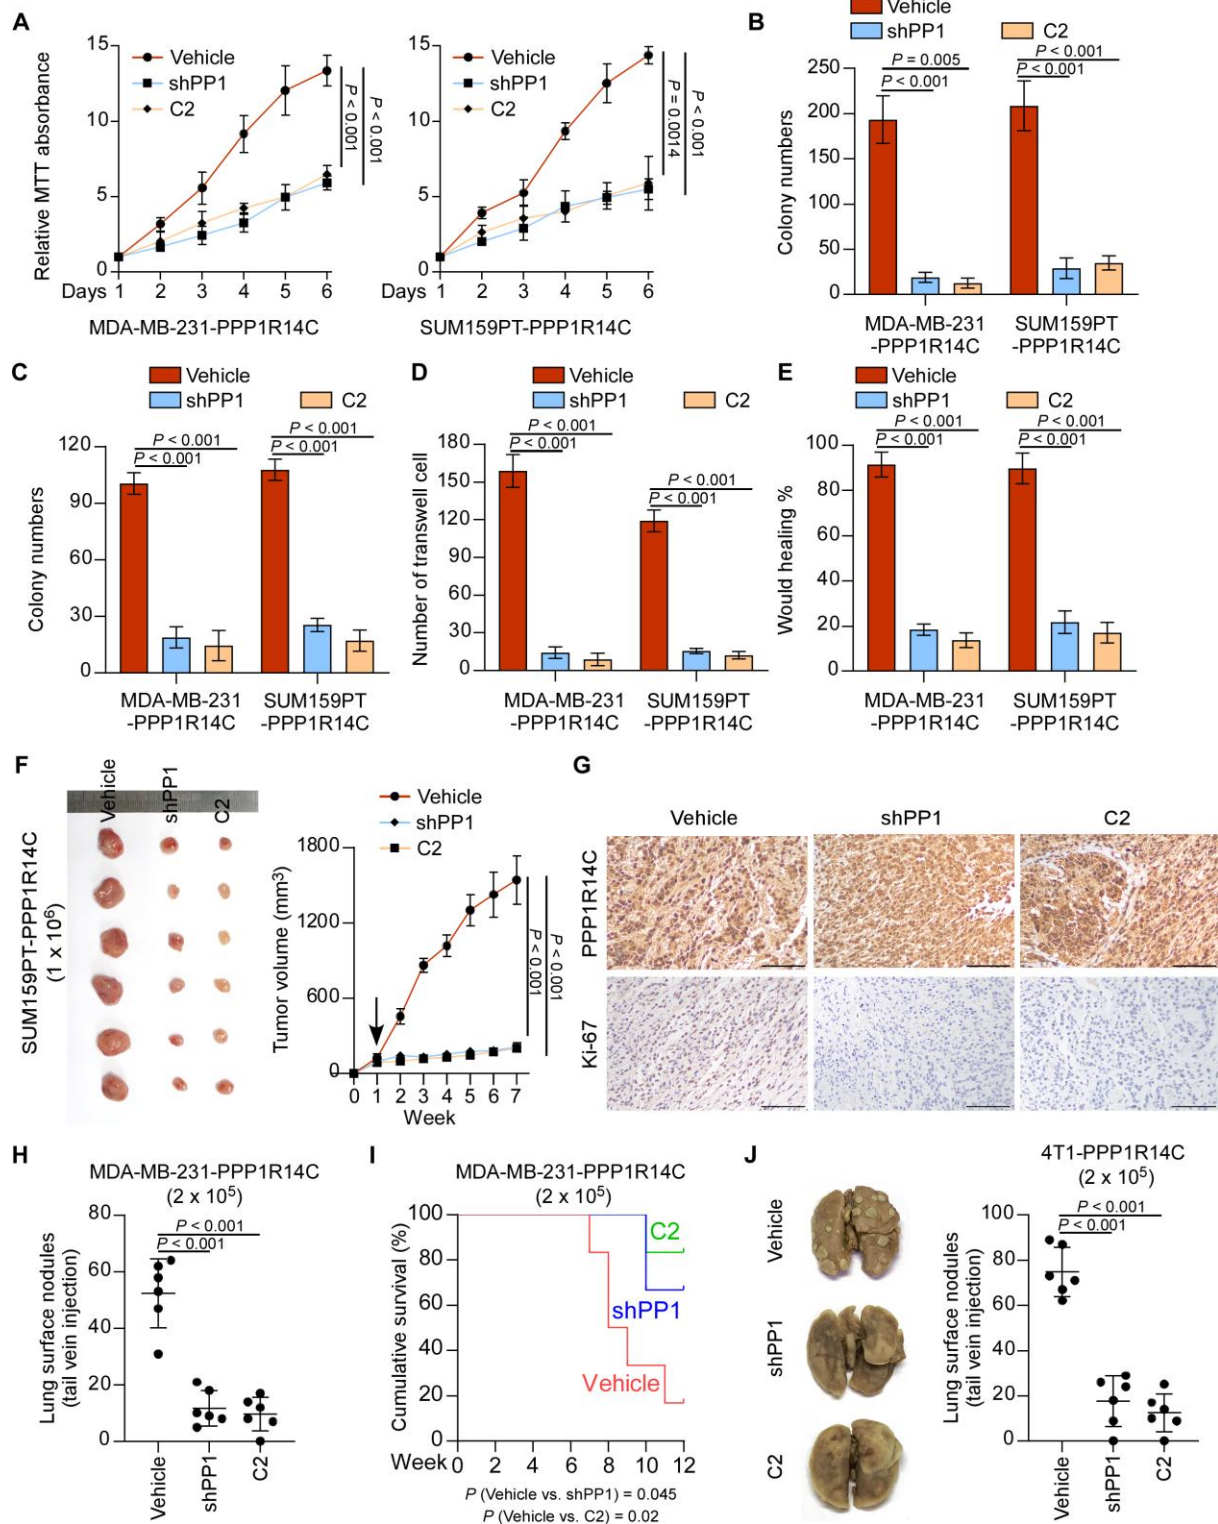

700

701 **Figure 7. Blockage of the PPP1R14C/PP1/p-GSK3 $\beta$  axis results in growth inhibition of**

702 **TNBC cells with high- PPP1R14C levels in vitro and in vivo. (A-E) MTT (A), colony**

703 **formation (B), soft agar (C), transwell (D), and wound healing (E) assays were performed in**

704 vehicle, shPP1, or C2 (10  $\mu$ M) in stably-overexpressed PPP1R14C MDA-MB-231 and  
705 SUM159PT cells. Data represent the means  $\pm$  S.D. of three independent experiments.  
706 Two-tailed Student's t test was used. **(F)** PPP1R14C-overexpressed cell lines SUM159PT with  
707 or without shPP1 were subcutaneously injected into mice ( $1 \times 10^6$ /injection, n = 6/group).  
708 One week after inoculation, control and shPP1 groups were treated with intraperitoneal 20%/  
709 80% DMSO/ saline, while treatment group received 100 mg/kg intraperitoneal C2 once per  
710 day. The tumor volumes in each group are shown. **(G)** IHC of PPP1R14C and Ki-67 staining  
711 showed in the indicated xenografts. Scale bars represent 100  $\mu$ m. **(H)** *In vivo* metastasis  
712 assays of vehicle, shPP1 and C2 treatment groups. The visible surface metastatic lesions were  
713 counted. **(I)** Kaplan–Meier survival curves of mice. **(J)** The visible surface metastatic lesions  
714 of lungs were counted. Two-tailed Student's t test and log-rank test were used.

715



**Figure 8**

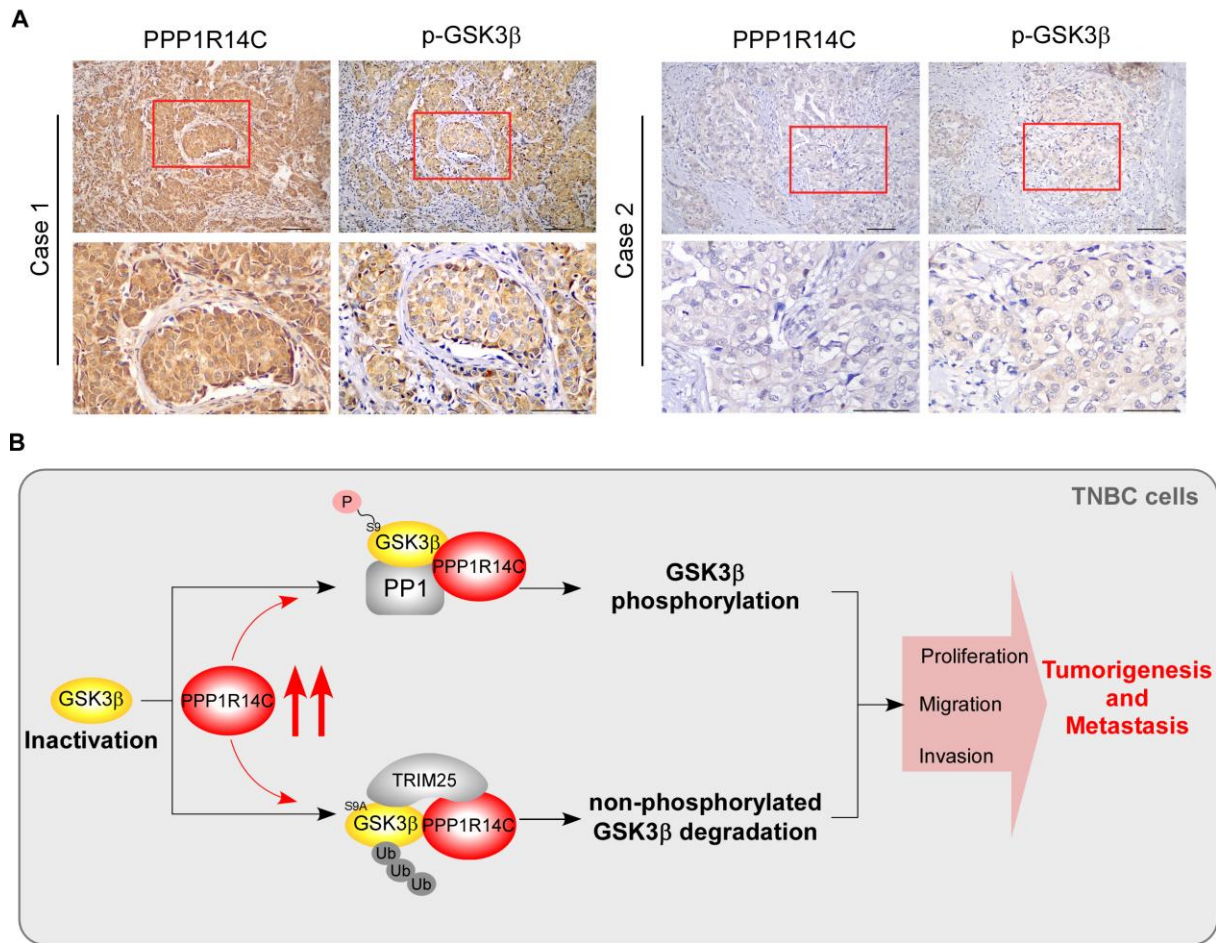

716

717 **Figure 8. Clinical relevance of the PPP1R14C/PP1/p-GSK3 $\beta$  axis in TNBC. (A)**

718 Representative images of PPP1R14C and p-GSK3 $\beta$  (Ser9) IHC staining in 100 specimens

719 from patients with breast cancer. Scale bars represent 100  $\mu$ m. **(B)** Illustration of the

720 Mechanism.

721

722 **Supplementary Figure Legends**

**Supplementary Figure 1**

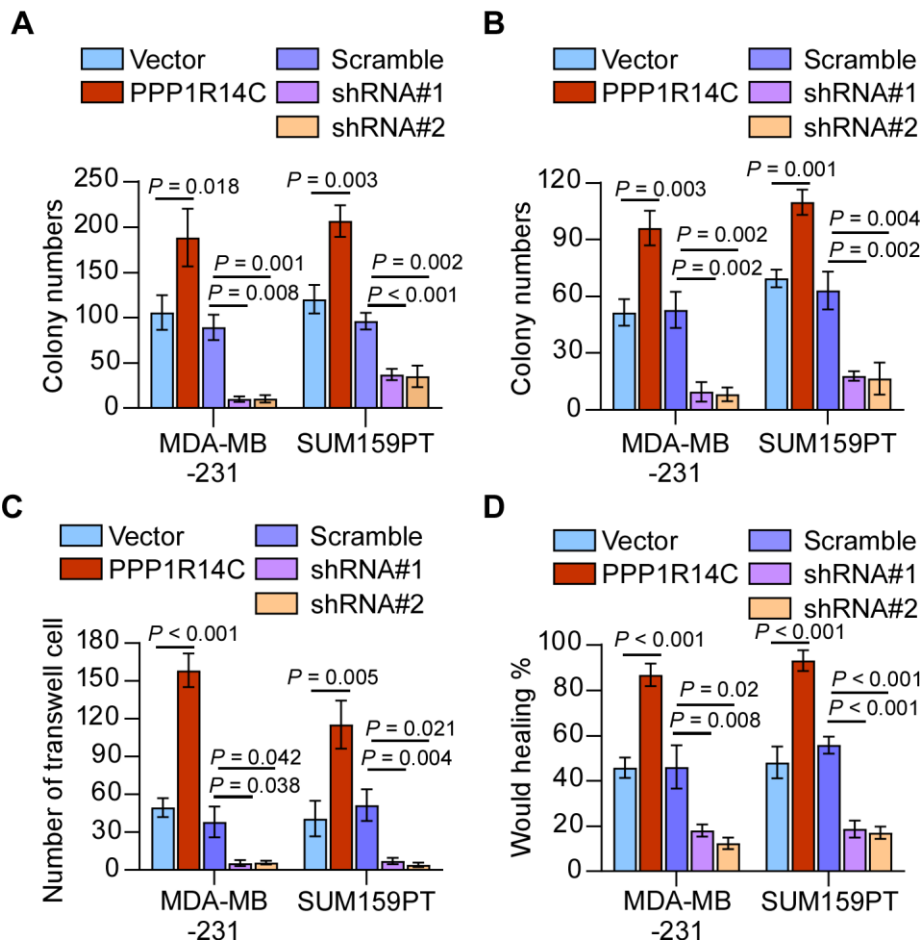

723

724 **Supplementary Figure 1. (A-D)** The quantifications of colony formation (A), soft agar (B),

725 transwell (C), wound healing (D) assays for the indicated cell lines. Two-tailed Student's t test

726 was used.

727

## Supplementary Figure 2

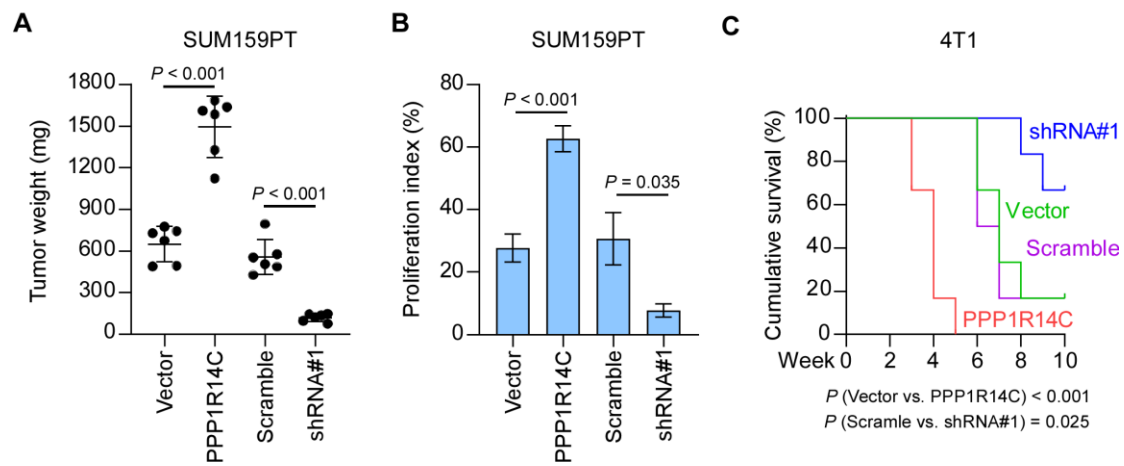

728

729 **Supplementary Figure 2.** (A) The tumor weights in the indicated groups are measured. (B)

730 Percentage of Ki-67 were shown in the indicated cells. (C) Kaplan–Meier survival curves of

731 mice injected with the indicated cells.

732

**Supplementary Figure 3**

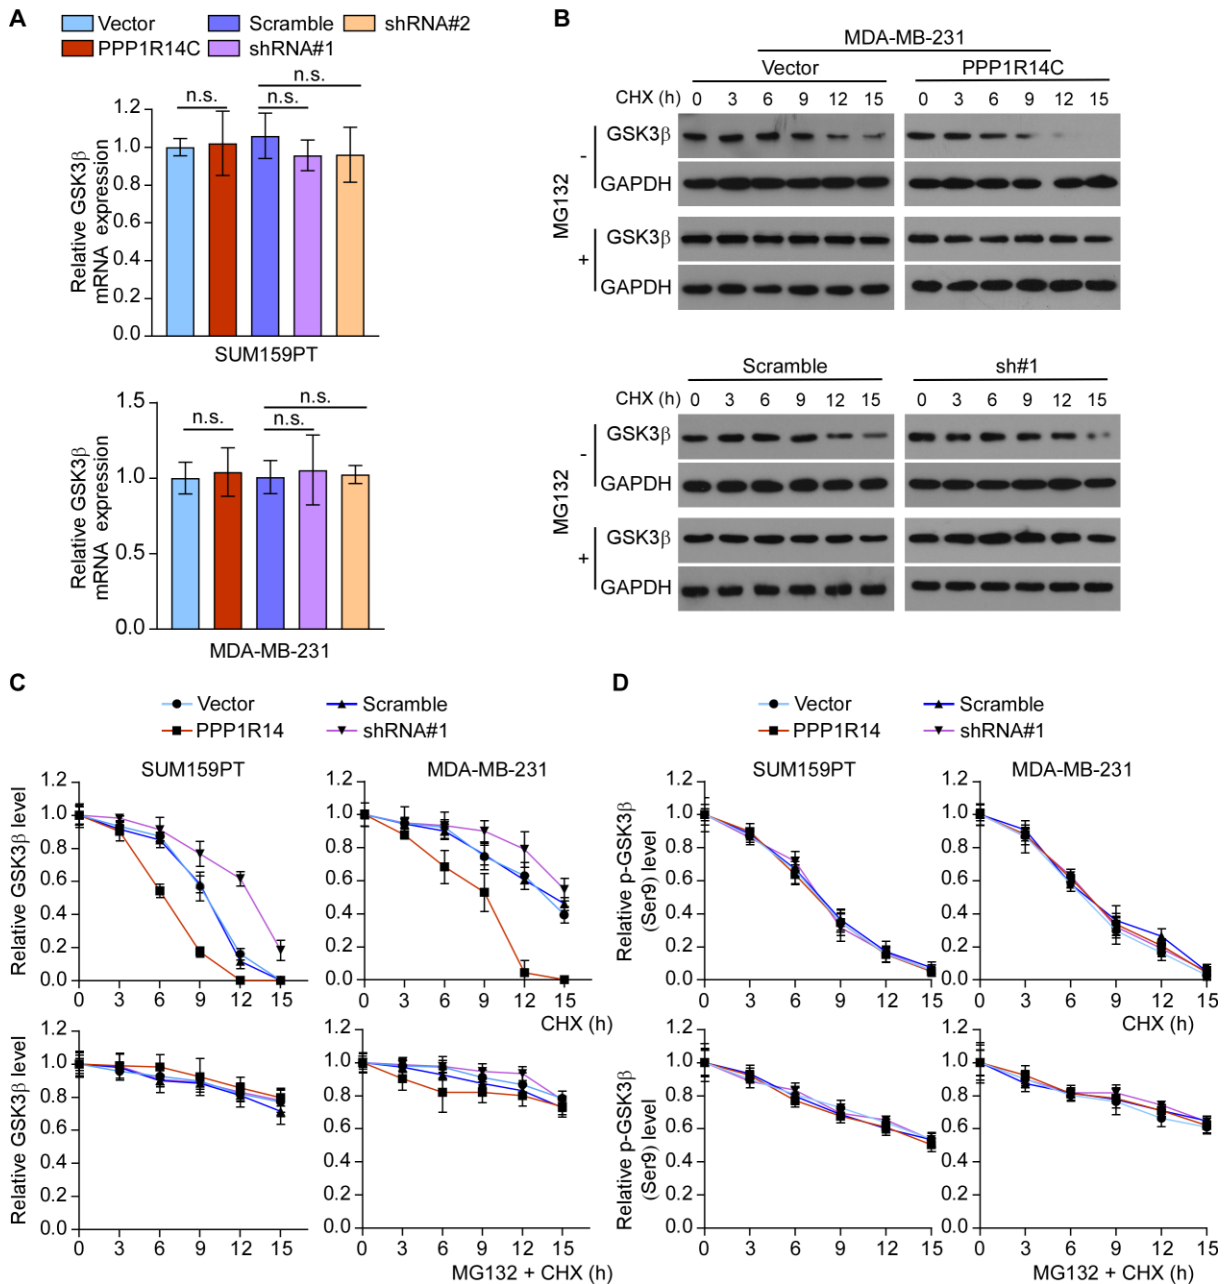

733

734 **Supplementary Figure 3.** (A) Real-time PCR analysis of GSK3 $\beta$  in control,

735 PPP1R14C-overexpressed and -knockdown TNBC cells. (B) Western blot analysis of GSK3 $\beta$

736 protein in MDA-MB-231 cells treated with CHX (50  $\mu$ g/mL) for 0, 30, 60, or 120 min plus

737 with or without MG132 (10  $\mu$ M) treatment. GAPDH was used as loading control. (C) The

738 statistical graph of Figure 6B and Supplementary Figure 4B. (D) The statistical graph of

739 p-GSK3 $\beta$  protein in TNBC cells treated with CHX (50  $\mu$ g/mL) for 0, 30, 60, or 120 min plus

740 with or without MG132 (10  $\mu$ M) treatment.

741

### Supplementary Figure 4

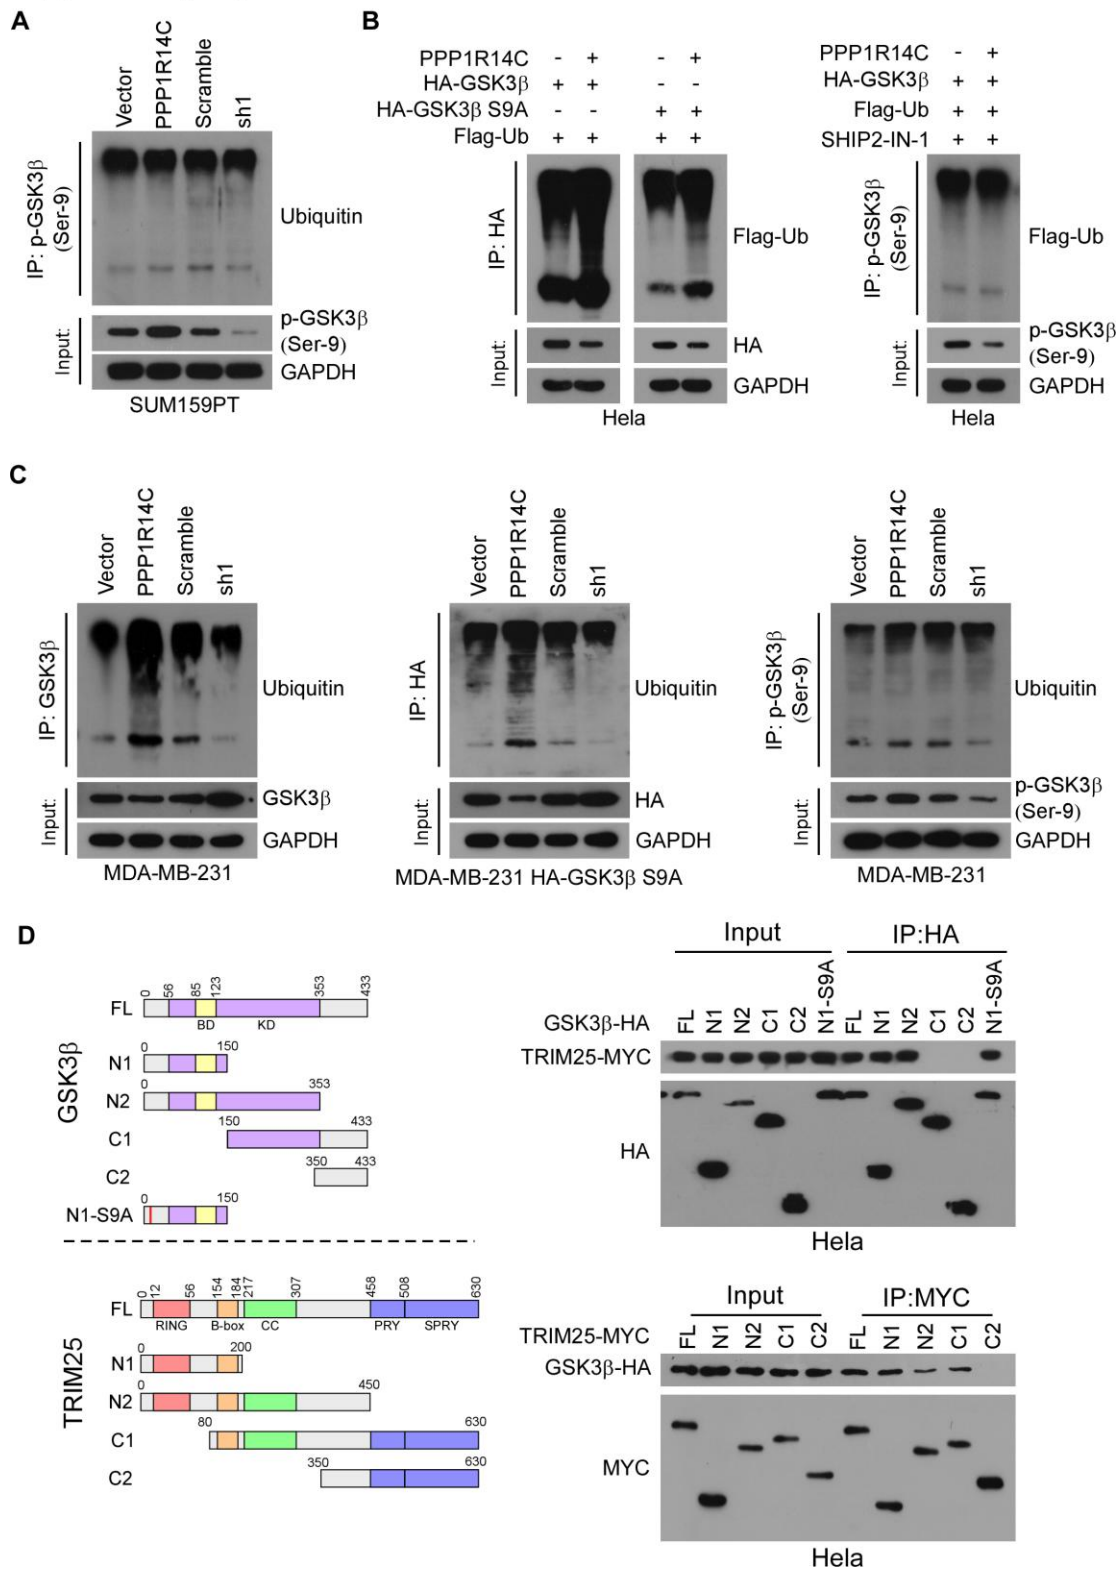

742

743 **Supplementary Figure 4.** (A) Effect of ubiquitination on p-GSK3β by immunoprecipitation

744 assay in SUM159PT cells using anti-p-GSK3β antibody to pull down. (B) Effect of

745 ubiquitination on GSK3β, non-phosphorylated GSK3β (S9A) and p-GSK3β by

746 immunoprecipitation assay in HeLa cells using anti-HA or anti-p-GSK3 $\beta$  antibody to pull  
747 down, respectively. **(C)** Effect of ubiquitination on different status of GSK3 $\beta$  by  
748 immunoprecipitation assay in MDA-MB-231 cells. **(D)** Left panel: the truncated mutants of  
749 GSK3 $\beta$  and TRIM25 were based on known functional domain. BD: binding domain; KD:  
750 kinase domain; RING: RING finger domain; B-box: B-box domain; CC: coiled-coil domain;  
751 PRY/SPRY: PRY/SPRY domain. Right panel: detailed interactions between GSK3 $\beta$  and  
752 TRIM25 were analyzed by IP assays.  
753

**Supplementary Figure 5**

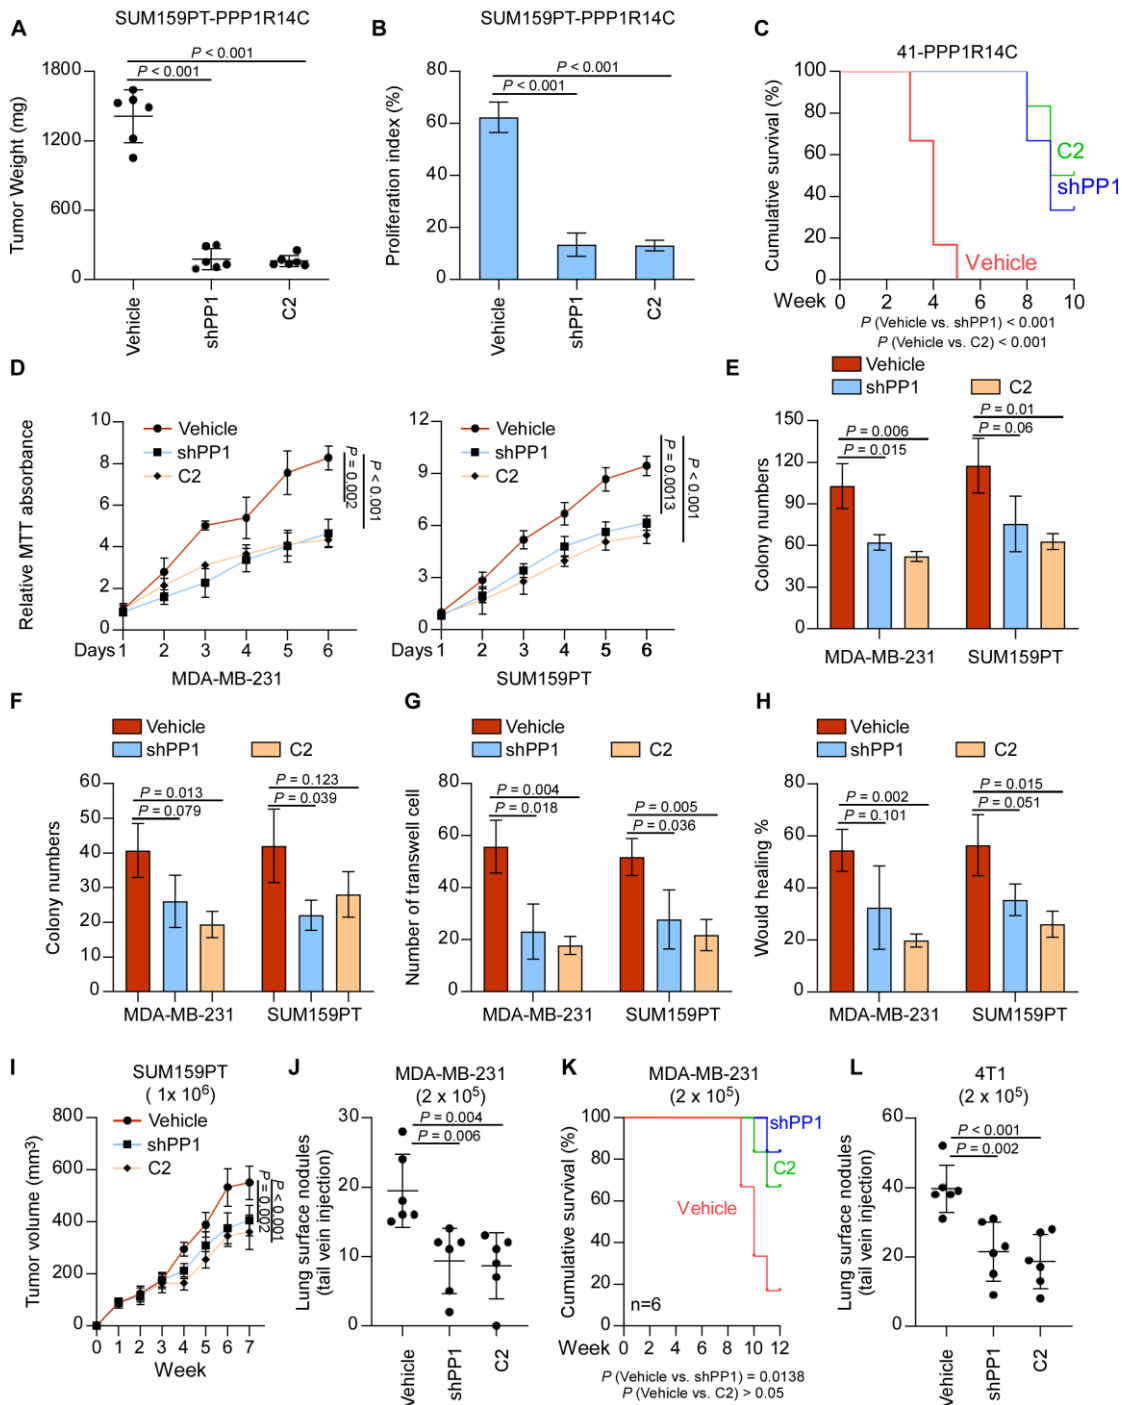

754

755 **Supplementary Figure 5.** (A-B) The tumor weights and proliferation index in each group are

756 shown. (C) Kaplan–Meier survival curves of mice. (D–H) MTT (D), colony formation (E),

757 soft agar (F), transwell (G), and wound healing (H) assays were performed in vehicle, shPP1,

758 or C2 (10 mM) in MDA-MB-231 and SUM159PT cells. Data represent the means  $\pm$  S.D. of

759 three independent experiments. Two-tailed Student's t test was used. (I) The tumor volumes in



760 MDA-MB-231-vehicle, -shPP1 and C2 treatment groups are shown. **(J)** *In vivo* metastasis  
761 assays of MDA-MB-231-vehicle, -shPP1 and C2 treatment groups. The visible surface  
762 metastatic lesions were counted. **(K)** Kaplan–Meier survival curves of mice. **(L)** The visible  
763 surface metastatic lesions of lungs were counted. Two-tailed Student’s t test and log-rank test  
764 were used.  
765

## Supplementary Figure 6

A

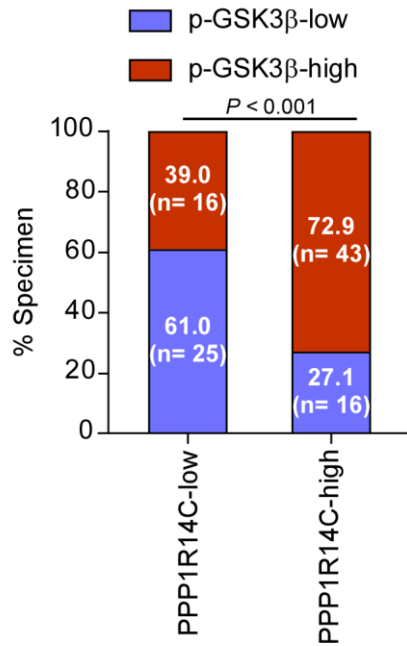

766

767 **Supplementary Figure 6.** (A) Correlation analysis revealed that PPP1R14C expression was

768 significantly associated with p-GSK3β (Ser9) expression in patient specimens ( $\chi^2$  test).
